1 **Article**

2 **The genome of Mekong tiger perch (*Datnioides undecimradiatus*) provides**  
3 **insights into the phylogenic position of Lobotiformes and biological conservation**

4

5 Shuai Sun<sup>1,2,3†</sup>, Yue Wang<sup>1,2,3,†</sup>, Xiao Du<sup>1,2,3,†</sup>, Lei Li<sup>1,2,3,4,†</sup>, Xiaoning Hong<sup>1,2,3,4</sup>, Xiaoyun Huang<sup>1,2,3</sup>, He Zhang<sup>1,2,3</sup>,  
6 Mengqi Zhang<sup>1,2,3</sup>, Guangyi Fan<sup>1,2,3</sup>, Xin Liu<sup>1,2,3,\*</sup>, Shanshan Liu<sup>1,2,3\*</sup>

7

8 <sup>1</sup> BGI-Qingdao, BGI-Shenzhen, Qingdao, 266555, China

9 <sup>2</sup> BGI-Shenzhen, Shenzhen, 518083, China

10 <sup>3</sup> China National GeneBank, BGI-Shenzhen, Shenzhen, 518120, China

11 <sup>4</sup> School of Future Technology, University of Chinese Academy of Sciences, Beijing 101408, China

12

13

14 <sup>†</sup> These authors contributed equally to this work.

15 \* Correspondence authors: [liushanshan@genomics.cn](mailto:liushanshan@genomics.cn) (S. L.), [liuxin@genomics.cn](mailto:liuxin@genomics.cn) (X. L.)

16

17 **Abstract**

18 Mekong tiger perch (*Datnioides undecimradiatus*) is one ornamental fish and a  
19 vulnerable species, which belongs to order Lobotiformes. Here, we report a ~595 Mb  
20 *D. undecimradiatus* genome, which is the first whole genome sequence in the order  
21 *Lobotiformes*. Based on this genome, the phylogenetic tree analysis suggested that  
22 *Lobotiformes* and *Sciaenidae* are closer than Tetraodontiformes, resolving a long-time  
23 dispute. We depicted the pigment synthesis pathway in Mekong tiger perch and result  
24 confirmed that this pathway had evolved from the shared whole genome duplication.  
25 We also estimated the demographic history of Mekong tiger perch, showing the  
26 effective population size suffered a continuous reduction possibly related to the  
27 contraction of immune-related genes. Our study provided a reference genome  
28 resource for the *Lobotiformes*, as well as insights into the phylogeny of Eupercaria  
29 and biological conservation.

30

31 **Instruction**

32 Mekong tiger perch (*Datnioides undecimradiatus*) [1] is one tropical freshwater fish,  
33 belonging to the order Lobotiformes under series Eupercaria. It is native to Mekong  
34 river and usually found in the main waterway and large tributaries of the Mekong

35 river basins, feeding on small fishes and shrimps [2]. It is also one ornamental fish,  
36 which is kept for its vertical yellow and black stripes running its body.

37

38 Eupercaria is by far the largest series of percomorphs with more than 6,600 species  
39 arranged in 161 families and at least 16 orders. The phylogenetic relationship of the  
40 order Lobotiformes, Tetraodontiformes, and the family Sciaenidae is in conflict.  
41 Mirande reported Sciaedidae as the sister clade of Tetraodontiformes, and then  
42 followed by Lobotiformes based on 44 DNA makers from uncompleted nuclear and  
43 mitochondrial sequences combined with morphological characters [3]. Compared to it,  
44 Betancur-R et al. reported Lobotiformes was more closely related to  
45 Tetraodontiformes than Sciaedidae using molecular and genomic data, which was also  
46 not complete or whole-genome sequenced for most of species. [4], agreed with this  
47 phylogeny by investigating. However, more recently Lobotiformes was reported to be  
48 more closely related to Sciaenidae than Tetraodontiformes based on complete  
49 mitochondrial genome [5]using and transcriptomic data [6]. Furthermore, fourteen  
50 families of Eupercaria included in order-level *incertae sedis*, which are called “new  
51 bush at the top”, were not arranged to explicit orders and interrelationships among  
52 them was a long-term issue [7]. Therefore, the whole-genome containing  
53 comprehensive evolutionary information is called for resolving the long-time dispute  
54 on the phylogenetic relationships of the huge number of species in Eupercaria,  
55 especially for the problem of “new bush at the top”.

56

57 In addition to its evolutionary importance, Mekong tiger perch has a body color  
58 pattern with vertical yellow and black stripes. Body color diversity in animals has  
59 important functions in numerous biological processes and social behaviors, such as  
60 sexual selection, kin recognition and changing coloration for camouflage [8]. Recent  
61 studies proposed that teleost genomes might contain more copies of genes involved in  
62 pigment cell development than tetrapod genomes after an ancient fish-specific  
63 genome duplication (FSGD), which might contribute to the evolution and  
64 diversification of the pigmentation gene repertoire in teleost fish [9]. With more  
65 genome sequences, especially for fish with unique body color schemes such as  
66 Mekong tiger perch, we can further apply comparative genomics to illustrate the

67 genetic mechanisms of body color development.

68

69 Mekong tiger perch is currently assigned as ‘Vulnerable’ due to the rapidly declined  
70 population size by the IUCN [10], and is considered as endangered (EN) by Thailand  
71 Red data [2]. The external factors, such as the construction of hydraulic engineering  
72 infrastructures, urban pollution, and the aquarium trade, are thought to be exerting a  
73 negative effect on wild populations. Meanwhile, internal genetic factors such as  
74 resistance to biological and abiotic stress may be related to their survivals. Due to its  
75 limited distribution and commercial values, rare genetic research has been focused on  
76 Mekong tiger perch. With the rapid development of genomics, each fish deserves the  
77 right to own its genome assembly representing its unique genetic resource, which will  
78 help to better investigate its unique characters and biological conservations.

79

80 Here, we sequenced Mekong tiger perch and assembled a reference genome, which  
81 was the first genome of the order Lobotiformes. We constructed a phylogenetic tree in  
82 Eupercaria based on the whole genome sequences, to elucidate the relationships  
83 among family Sciaenidae, order Lobotiformes and order Tetraodontiformes, providing  
84 insights into the phylogenic position of Lobotiformes. Utilizing the assembled  
85 genome, we identified genes involved in the cell development regulation and pigment  
86 synthesis in Mekong tiger perch. We confirmed population decline by the analysis of  
87 demographic history and found the contraction of immune-related genes might be a  
88 contributing factor for Mekong tiger perch’s vulnerability. The genome assembly of  
89 Mekong tiger perch provided a valuable genome resource for future fish studies in  
90 Lobotiformes, and also contributes to the understanding of body color development as  
91 well as demographic history and conservation.

92

## 93 **Results**

### 94 **Genome assembly, annotation, and genomic features**

95 We sampled muscle tissue from a Mekong tiger perch captured in Mekong river  
96 (**Supplementary Fig. 1**), and applied single tube long fragment read (stLFR) [11]

97 technology for whole genome sequencing, generating stLFR co-barcode reads 122.4  
98 Gb raw data. After filtering low-quality and duplicated reads, we obtained 75.3 Gb  
99 clean data for genome assembly using supernova [12], and gaps were closed using  
100 GapCloser [13]. We obtained a final genome assembly spanning 595 Mb, accounting  
101 for 95.5% of the estimated genome size (623 Mb, **Supplementary Fig. 2**). The  
102 assembly achieved a high level of contiguity, with a total of 4,959 scaffolds and  
103 scaffold N50 of 9.73 Mb. The longest 71 scaffolds (longer than 1.41 Mb) accounted  
104 for 90% of the total genome, and the longest scaffold reached up to 39.31 Mb (**Fig. 1**,  
105 **Table 1 and Supplementary table 1**). Total repeat content accounted for 11.97%  
106 (**Table 1 and Supplementary table 2**) of the genome, and 29,150 protein-coding  
107 genes were predicted via *ab initio* and homology-based methods (**Table 1**). The  
108 average length of coding sequences (CDS) was 1,510 bp with an average of 9 exons  
109 per gene, which were similar to that of other related species (**Supplementary table 3**  
110 **and Supplementary Fig. 3**). The ncRNAs including miRNA, tRNA, rRNA, and  
111 snRNA were also annotated with a total length of 179 kb (**Supplementary table 4**).  
112 We used BUSCO metazoan database (v9) to evaluate the completeness of gene sets  
113 and observed a completeness of 95.34%. Other databases including Actinopterygii (v9)  
114 and vertebrata (v9) estimated the completeness to be 94% and 91%, separately  
115 (**Supplementary Fig. 4**). Furthermore, the mitochondrial genome was assembled a  
116 total length of 16,606 bp, containing 18 coding genes, 2 rRNA, and 17 tRNA  
117 (**Supplementary table 5**).

118

119 CpG islands (CGIs) are an important group of CpG dinucleotides in the guanine-  
120 and cytosine rich regions as they harbor functionally relevant epigenetic loci for  
121 whole genome studies. 32,148 CpG islands (CGIs) were identified with a total length  
122 up to 18.8 Mb. The CpG density has the most prominent correlations with three other  
123 genomic features. It correlated positively with CG content density and gene density,  
124 and correlated negatively with repeat density (**Fig. 1b and Supplementary table 6**),  
125 showing a similar pattern observed in other published fishes or mammal [14-16].

126

## 127 **Phylogenetic tree of Eupercaria uncovers the phylogenetic position of** 128 **Lobotiformes**

129 To clarify the evolutionary relationships of major orders in Eupercaria clade, 9  
130 sequenced species from 7 different orders were used in the comparative genomics  
131 analysis (**Supplementary table 7**). We clustered the gene families based on protein  
132 sequences similarity and obtained a total of 13,785 gene families, 1,428 of which  
133 were single-copy gene families (**Supplementary Fig. 5 and Supplementary table 8**).  
134 The nucleotide sequences on the four-fold degenerate (4d) site of those single-copy  
135 gene families were used to construct the maximum likelihood (ML) tree. The  
136 phylogeny of the seven orders was found consistent with the previous study [5, 6].  
137 Order Perciformes was identified as the early branch to other orders in Eupercaria,  
138 and the divergent time was estimated 101.9 million years ago (mya). Our  
139 phylogenetic tree (**Fig. 2a**) showed Lobotiformes was more related to Sciaenidae than  
140 to Tetraodontiformes, which supported the results of some previous studies [5, 6].  
141 Furthermore, the divergence time between Lobotiformes and Sciaenidae was inferred  
142 to be 82.9 mya (**Fig 2a**).

143

144 The conserved genomic synteny reflects the arrangements on evolutionary  
145 processes was used to further demonstrate the ambiguous phylogeny among  
146 Lobotiformes and closely related orders. The syntenic analysis both at whole-genome  
147 nucleotide-level and gene-level were performed by aligning *L. crocea* and *T. rubripes*  
148 to our assembled *D. undecimradiatus*, separately. At whole-genome nucleotide-level  
149 after filtering alignment length < 1kb, 41.76 % of *D. undecimradiatus* genome  
150 sequences were covered by *L. crocea* genome with an average of 2.29 kb per block. In  
151 comparison, only 10.48% of *D. undecimradiatus* genome sequences were covered by  
152 *T. rubripes* genome with an average of 1.65 kb per block (**Fig. 2b and**  
153 **Supplementary table 9**). Similarly, at the whole genes level after keeping block  
154 length > 3 genes, 89.19% of *D. undecimradiatus* genes showed synteny with *L.*  
155 *crocea* with an average of 50.28 genes per block, and 77.21% of *D. undecimradiatus*  
156 genes had synteny with *T. rubripes* with an average of 41.28 genes per block (**Fig. 2c**  
157 **and Supplementary table 10**). Despite the difference in genome size, both *L. crocea*  
158 and *T. rubripes* genomes were assembled to comparable chromosome level and the

159 BUSCO assessments showed no significant differences in the completeness of  
160 genome and gene set between *L. crocea* and *T. rubripes* (**Supplementary table 11**). In  
161 addition, the distribution of the length of syntenic blocks at both whole-genome  
162 nucleotide-level and gene-level showed significant difference by t-test statistics  
163 (nucleotide-level,  $p$ -value<0.0001; gene-level,  $p$ -value<0.05) (**Supplementary Fig. 6**).  
164 Therefore, the results of synteny suggested that the Lobotiformes had better  
165 evolutionary conservation and closer relationship with Sciaenidae than with  
166 Tetraodontiformes, providing strong evidence for the constructed phylogenetic tree.

167

168 To further demonstrate the phylogeny among Lobotiformes, Sciaenidae, and  
169 Tetraodontiformes, only the homologous genes of 1:1:1 on the syntenic blocks were  
170 inferred as reliable orthologous genes to construct the genes genealogy, with the  
171 human CDS sequences as outgroup in the rooted tree. 73% of the 3,974 orthologous  
172 gene sets supported that *D. undecimradiatus* was more closely related to *L. crocea*,  
173 supporting Lobotiformes as sister group to Sciaenidae, instead of the other two  
174 hypotheses (**Fig. 2d**).

175

### 176 **The genes involved in pigment development and two copies of three rate-limiting** 177 **genes of pigment synthesis as the result of FSGD similar to other teleosts**

178 In consideration of special skin color pattern, among established pigmentation  
179 database containing 198 genes [17], 172 genes were found on our genome, occupying  
180 92% of the database and possibly genetic basis for the phenotypic characteristics of  
181 vertical yellow and black stripes running its body (**Supplementary table 12**). For two  
182 major pigment synthesis pathways in *D. undecimradiatus*, three main rate-limiting  
183 genes of Tyrosinase family (*TYR*, *DCT*, *TYRPI*) in the melanin synthesis pathway  
184 have two copies respectively (**Fig.3a**) and one main rate-limiting gene SPR in  
185 pteridine synthesis pathway also have two copies (**Fig. 3b**). This suggests *D.*  
186 *undecimradiatus* retained the pigment related genes from a fish-specific  
187 whole-genome duplication (FSGD), which was also observed in many other teleosts.  
188 It should be noted that the phylogeny of those genes also served as another evidence  
189 to the evolution relationship among the three close relative orders.

190

191 **Decreasing population size related to the contraction of immune-related gene**  
192 **families provides clues to biological conservation**

193 Pairwise sequentially Markovian coalescent (PSMC) was used to infer the  
194 demographic history of Mekong tiger perch. The effective population size  
195 continuously reduced since LGM (last glacial maximum), and there were no signs of  
196 recovery to date, which was consistent with its vulnerable state [2, 10](Fig. 4a).

197 The change of genes copy number plays a role in the species adaptation [18] To  
198 investigate the genetic basis potentially related to fish survival, we identified the  
199 expanded and contracted gene families in Mekong tiger perch, and 19 and 101  
200 significantly expanded and contracted gene families were found ( $p$ -value < 0.05),  
201 separately (Fig. 4b). 62 contracted and 18 expanded gene families were annotated to  
202 KEGG ortholog functions. The top enriched KEGG pathway was the immune-related  
203 pathway with fifteen contracted gene families (Fig. 4c and Supplementary table  
204 13-14), Furthermore, the most gene families' KO were annotated to the genes MHC1,  
205 NLRP12, ANK (ankyrin), IGH CLDN, and PLAUR (Supplementary Table 15),  
206 which may play a role in the adaptive immunity and survival. For example, MCH1,  
207 which was responsible for presenting peptides on the cell surface for recognition by T  
208 cells [19], was significantly contracted in *D. undecimradiatus* with only 2 copies,  
209 compared to 22 copies in closely related *L. crocea* and 14 copies in *T. rubripes* (Fig.  
210 4c). NLRP12, which play a role in regulating inflammation and immunity [20], there  
211 were 13 copies in *D. undecimradiatus*, compared to 20 copies in *L. crocea* and 29  
212 copies in *T. rubripes*. The contraction of immune-related genes may affect the  
213 capacity of Mekong tiger perch to adapt to environmental changes or stress, implying  
214 of human-mediated species and environmental conservation is meaningful.

215 **Discuss**

216 The phylogeny of Eupercaria plays a fundamental role in species classification and  
217 uncovering the species evolutionary history at the Cretaceous–Palaeogene  
218 boundary[21]. However, although species in series Eupercaria account for more than  
219 twenty percent of the bony fish, the Eupercaria phylogeny is ambiguous or conflicted,  
220 especially for the “new bush at the top”. Meanwhile, the resolution of the phylogeny

221 is currently limited to the order level, and few studies could go down to the class level  
222 or species level. Relying on limited morphological characters and molecular  
223 sequences, it is difficult to draw convincing conclusion[3-6]s. In contrast, whole  
224 genome sequencing provides sufficient information to perform the phylogenetic  
225 analysis of species. In our study, we clarified the relationship of order Lobotiformes to  
226 its related orders, Sciaenidae and Tetraodontiformes. With the rapid development of  
227 sequencing technology, large-scale fish genome sequencing projects can be achieved,  
228 such as fish 10k project (<http://icg-ocean.genomics.cn/index.php/fish10kintroduction/>).  
229 Those projects will greatly promote studies on the fishes' classification and evolution.

230

231 Skin color is a biologically important trait, which is a fascinating research topic and  
232 has great implications on biological adaptation, commercial value, and skin health[22,  
233 23]. In our study, most genes involved in pigmentation development, regulation and  
234 synthesis can be found in our assembled genome. However, research of underlying  
235 mechanisms is difficult to penetrate with limited genome resource. More fish genome  
236 data and molecular experiments will facilitate the analysis of skin color regulation  
237 mechanisms.

238

239 Biological conservation is an important research content of the relationship  
240 between human and nature [23], and different species vary in their adaptive capacities.  
241 In our study, immune-related genes of Mekong tiger perch were significantly  
242 contracted relative to closely related species, indicating that its environmental  
243 adaptability possibly responsible for its vulnerability. Therefore, it is necessary for  
244 humans to take various measures to protect it, such as improving the living  
245 environment, reducing fishing, artificial breeding, etc., and thus help maintain species  
246 diversity.

247

## 248 **References**

- 249 1. Roberts, T.R. and M. Kottelat, *The Indo-Pacific tiger perches: with a new species from the*  
250 *Mekong basin (Pisces: Coiidae)*. 1994.
- 251 2. Vidthayanon, C., *Thailand red data: fishes*. 2005.
- 252 3. Mirande, J.M., *Combined phylogeny of ray-finned fishes (Actinopterygii) and the use of*



- 253 *morphological characters in large-scale analyses*. *Cladistics*, 2017. **33**(4): p. 333-350.
- 254 4. Betancur-R, R., et al., *Phylogenetic classification of bony fishes*. *BMC Evolutionary Biology*,  
255 2017. **17**(1): p. 162.
- 256 5. Yang, H., et al., *Characterization of the complete mitochondrial genome sequences of three*  
257 *croakers (perciformes, sciaenidae) and novel insights into the phylogenetics*. *International*  
258 *Journal of Molecular Sciences*, 2018. **19**(6): p. 1741.
- 259 6. Hughes, L.C., et al., *Comprehensive phylogeny of ray-finned fishes (Actinopterygii) based on*  
260 *transcriptomic and genomic data*. *Proceedings of the National Academy of Sciences*, 2018.  
261 **115**(24): p. 6249-6254.
- 262 7. Nelson, G., *Phylogeny of major fish groups*, in *Phylogeny of major fish groups*, B. Fernholm,  
263 et al., Editors. 1989, Amsterdam: Elsevier Science. p. 325-336.
- 264 8. Protas, M.E. and N.H. Patel, *Evolution of coloration patterns*. *Annual Review of Cell and*  
265 *Developmental Biology*, 2008. **24**: p. 425-446.
- 266 9. Braasch, I., M. Schartl, and J.N. Volf, *Evolution of pigment synthesis pathways by gene and*  
267 *genome duplication in fish*. *BMC Evolutionary Biology*, 2007. **7**(1): p. 74.
- 268 10. IUCN, *The IUCN Red List of Threatened Species, version 2018-2*. 2018.
- 269 11. Wang, O., et al., *Efficient and unique cobarcoding of second-generation sequencing reads*  
270 *from long DNA molecules enabling cost-effective and accurate sequencing, haplotyping, and*  
271 *de novo assembly*. *Genome Research*, 2019. **29**(5): p. 798-808.
- 272 12. Weisenfeld, N.I., et al., *Direct determination of diploid genome sequences*. *Genome Research*,  
273 2017. **27**(5): p. 757-767.
- 274 13. Luo, R., et al., *SOAPdenovo2: an empirically improved memory-efficient short-read de novo*  
275 *assembler*. *Gigascience*, 2012. **1**(1): p. 18.
- 276 14. Barazandeh, A., et al., *Genome-wide analysis of CpG islands in some livestock genomes and*  
277 *their relationship with genomic features*. *Czech Journal of Animal Science*, 2016. **61**(11): p.  
278 487-495.
- 279 15. Han, L., et al., *CpG island density and its correlations with genomic features in mammalian*  
280 *genomes*. *Genome Biology*, 2008. **9**(5): p. R79.
- 281 16. Wright, S.I., N. Agrawal, and T.E. Bureau, *Effects of recombination rate and gene density on*  
282 *transposable element distributions in Arabidopsis thaliana*. *Genome Research*, 2003. **13**(8): p.  
283 1897-1903.
- 284 17. Lorin, T., et al., *Teleost Fish-Specific Preferential Retention of Pigmentation Gene-Containing*  
285 *Families After Whole Genome Duplications in Vertebrates*. *G3*, 2018. **8**(5): p. 1795-1806.
- 286 18. Katju, V. and U. Bergthorsson, *Copy-number changes in evolution: rates, fitness effects and*  
287 *adaptive significance*. *Front in Genetics*, 2013. **4**: p. 273.
- 288 19. Wiczorek, M., et al., *Major Histocompatibility Complex (MHC) Class I and MHC Class II*  
289 *Proteins: Conformational Plasticity in Antigen Presentation*. *Frontiers in Immunology*, 2017.  
290 **8**: p. 292.
- 291 20. Tuncer, S., M.T. Fiorillo, and R. Sorrentino, *The multifaceted nature of NLRP12*. *Journal of*  
292 *Leukocyte Biology*, 2014. **96**(6): p. 991-1000.
- 293 21. Alfaro, M.E., et al., *Explosive diversification of marine fishes at the Cretaceous–Palaeogene*  
294 *boundary*. *Nature Ecology Evolution*, 2018. **2**(4): p. 688.
- 295 22. Deng, L. and S. Xu, *Adaptation of human skin color in various populations*. *Hereditas*, 2018.  
296 **155**(1): p. 1.

297 23. Rehbein, H. and J. Oehlenschläger, *Fishery products: quality, safety and authenticity*. 2009:  
298 John Wiley & Sons.

299

300

## 301 **Main Tables and Figures**

302 **Table 1.** Assembly and annotation of the Mekong tiger perch genome

| Genome assembly            |             | Repeat content     |       | Genes finding and annotation        |         |
|----------------------------|-------------|--------------------|-------|-------------------------------------|---------|
| <b>Total Length (bp)</b>   | 594,964,832 | <b>DNA (%)</b>     | 6.11  | <b>gene number</b>                  | 29,150  |
| <b>Number of scaffolds</b> | 4442        | <b>LINE (%)</b>    | 2.75  | <b>average gene length (bp)</b>     | 13,759  |
| <b>longest scaffold</b>    | 39.31 Mb    | <b>SINE (%)</b>    | 0.19  | <b>average mRNA length (bp)</b>     | 1510    |
| <b>N content (%)</b>       | 2.17        | <b>LTR (%)</b>     | 2.37  | <b>average exon number per gene</b> | 9.04    |
| <b>GC content</b>          | 42.74       | <b>Other (%)</b>   | 0     | <b>average exon length (bp)</b>     | 167.03  |
| <b>N50 / NG50</b>          | 9.73Mb / 18 | <b>Unknown (%)</b> | 3.35  | <b>average intron length (bp)</b>   | 1522.83 |
| <b>N90 / NG90</b>          | 1.41Mb / 71 | <b>Total (%)</b>   | 11.97 | <b>annotated genes</b>              | 19,837  |

303

304

305

306

307

308

309

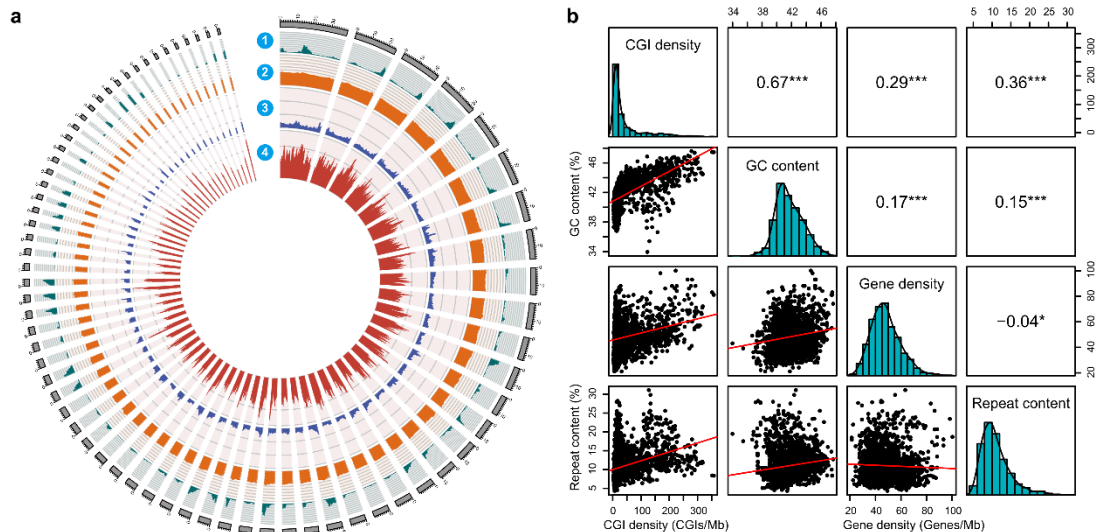

310

311 **Fig1. The genome features of *D. undecimradiatus*.** (a) A Circos plot representing  
 312 four features using sliding overlapping windows of 1Mb length with 200kb step  
 313 through the 71 scaffolds (scales in Mb), which accounts for 90% of genome. (1) CGI  
 314 content, measured by CGIs number per million base pairs (megabase, Mb). The range  
 315 of the axis is 0 to 500. (2) GC content, measured by the proportion of GC in  
 316 unambiguous bases of 1 Mb window size. The range of the axis is 0 to 100. (3)  
 317 Repeat content, measured by the proportion of repeat regions of 1 Mb window size.  
 318 The range of the axis is 0 to 100. (4) Gene density, measured by genes number per  
 319 million base pairs. (b) Correlation matrix plot with significance levels between four  
 320 genome features. The lower triangular matrix is composed by the bivariate scatter  
 321 plots with a fitted linear model. The diagonal shows the distribution by histogram  
 322 with density curve. The upper triangular matrix shows the Pearson correlation plus  
 323 significance level (as stars). Different significance levels are highlighted with  
 324 asterisks: p-values 0.001 (\*\*\*), 0.01 (\*\*), 0.05 (\*). This plot was generated with the  
 325 “psych” package in R (v3.5.0).

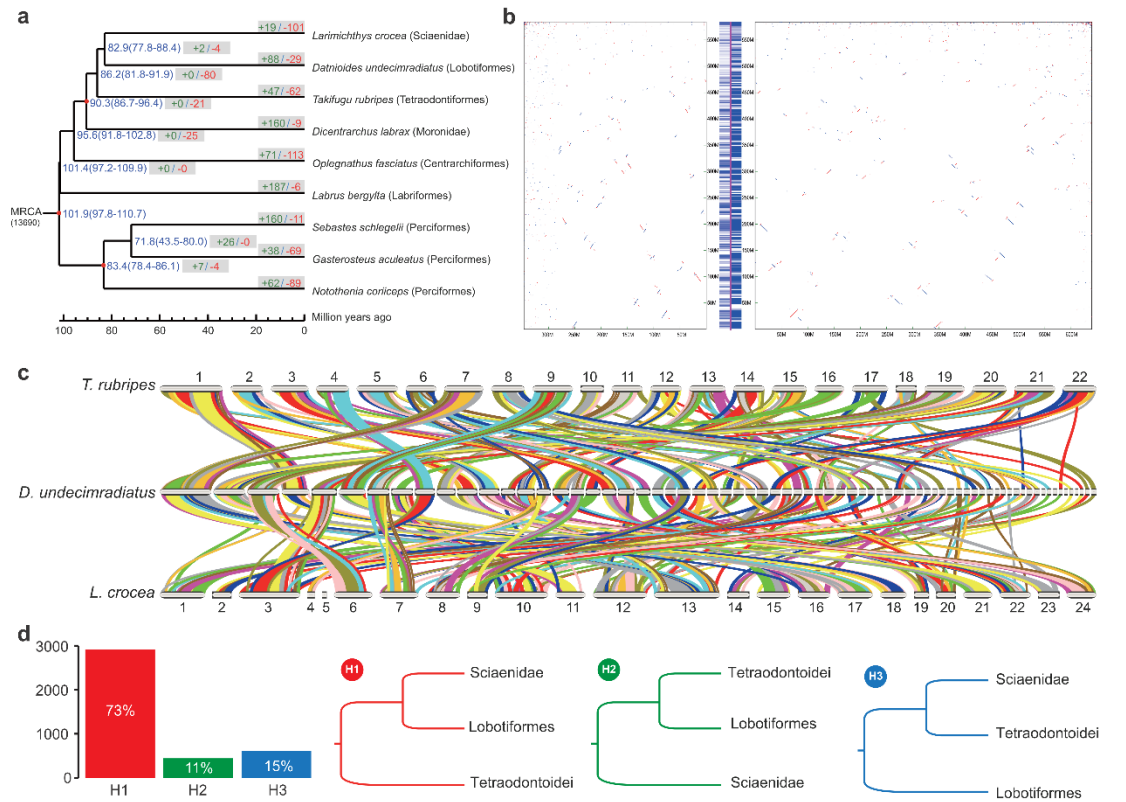

326

327 **Fig. 2 The phylogenetic and genome analysis for *D. undecimradiatus* and other**  
 328 **related species. (a) Time-calibrated maximum likelihood phylogenetic tree of nine**  
 329 **species from Eupercaria. Red Nodes represents the calibration time points obtained**  
 330 **from TreeTime. The estimated divergent time (mean and 95% highest-probability) are**  
 331 **showed on the right of the nodes. Behind the divergent time, the green positive**  
 332 **number and the red negative number in grey boxes stand for the number of gene**  
 333 **families significantly expanded and contracted, respectively. (b) Synteny of *D.***  
 334 ***undecimradiatus* between *L. crocea* and *T. rubripes* at whole-genome nucleotide level.**  
 335 **The y-axis represents the *D. undecimradiatus* genome, and the left x-axis refers to *T.***  
 336 ***rubripes* and right x-axis refers to *L. crocea*. The fringe plot on the left of y-axis**  
 337 **represents the synteny regions between *D. undecimradiatus* and *T. rubripes* on *D.***  
 338 ***undecimradiatus* genome. The fringe plot on the right of y-axis represents the synteny**  
 339 **regions between *D. undecimradiatus* and *L. crocea* on *D. undecimradiatus* genome. (c)**  
 340 **synteny of *D. undecimradiatus* between *L. crocea* and *T. rubripes* at gene level and**  
 341 **different colors represent different synteny blocks. (d) The number of gene genealogy**  
 342 **that supports for three hypotheses concerning the Lobotiformes phylogeny.**

343

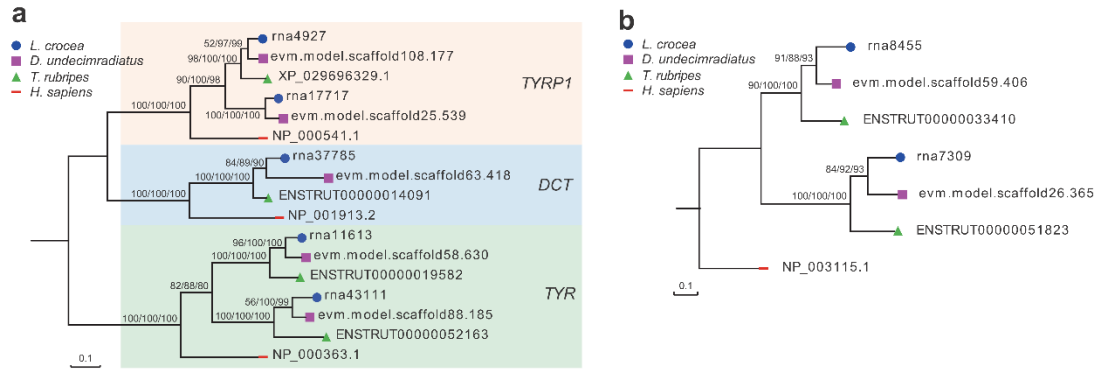

344

345 **Fig. 3 The phylogeny of main rate-limiting genes involved in the pigment**  
346 **synthesis. (a) The concordant phylogeny of TYR gene family (*TYRP1*, *DCT* and *TYR*)**  
347 **using maximum likelihood, neighbor-join and minimal evolutionary methods,**  
348 **Corresponding bootstrap values were showed on branch labels. (b) The concordant**  
349 **phylogeny of *SPR* gene using maximum likelihood, neighbor-join and minimal**  
350 **evolutionary methods. Corresponding bootstrap values were showed on branch labels.**

351

352

353

354

355

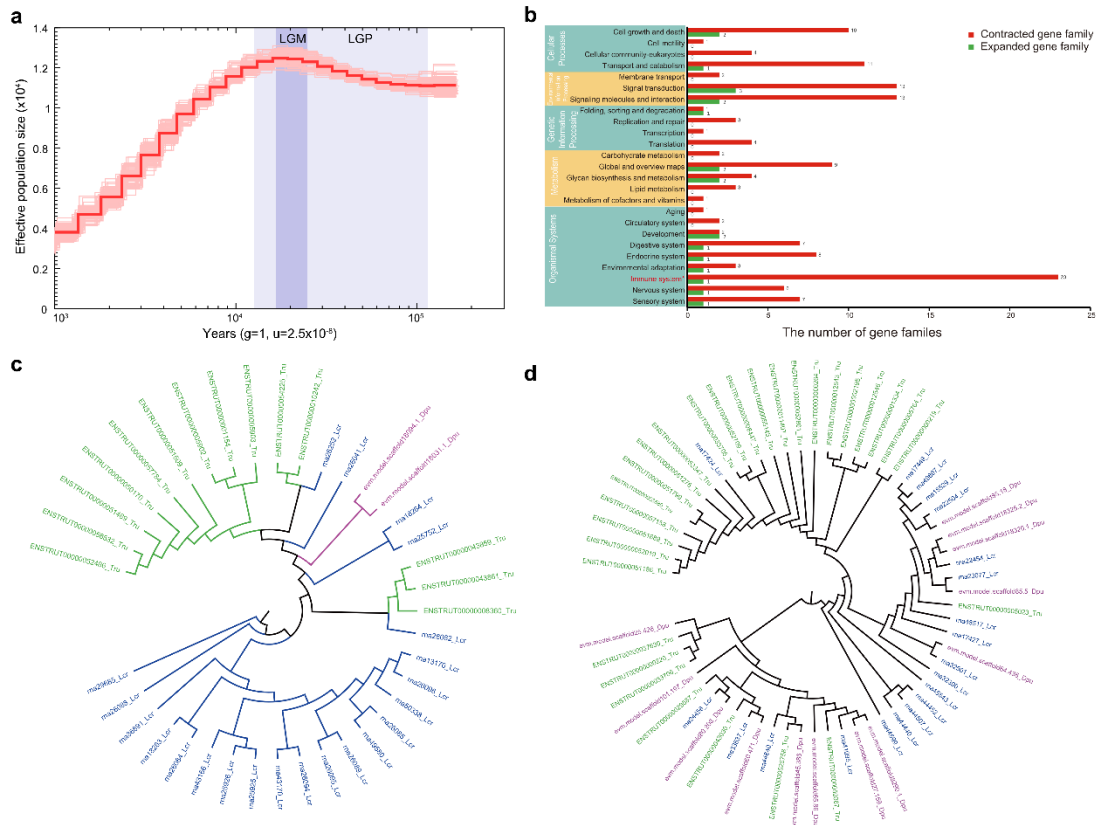

356

357 **Fig. 4 The demographic history of *D. undecimradiatus* and genetic basis possibly**  
 358 **associated with vulnerability. (a)** The population history of *D. undecimradiatus*  
 359 inferred using PSMC. LGM (last glacial maximum, ~26.5-19 kya) and LGP (last  
 360 glacial period, ~102-1.05 kya) are shaded in gray. **(b)** The number of significantly  
 361 contracted and expanded gene families ( $P$ -value < 0.05) involved in different KEGG  
 362 pathway (at level 1 and level 2). The number at the right end of the bar indicates the  
 363 number of gene families. **(c)** Phylogenetic tree of *MHC1* gene family. Green color  
 364 refers to *T. rubripes*, and blue and red refers to *L. crocea* and *D. undecimradiatu*  
 365 separately. **(d)** Phylogenetic tree of *NLRP12* gene family. Green color represents *T.*  
 366 *rubripes*, and blue and red represents *L. crocea* and *D. undecimradiatu* separately.

367

368

369

370

## 371 **Materials and Method**

### 372 ***DNA extraction and stLFR library construction, and sequencing***

373 The long genomic DNA molecules were extracted from the muscle of Mekong tiger  
374 perch. The stLFR library was constructed following the standard protocol using  
375 MGIEasy stLFR library preparation kit (PN:1000005622) [11]. In details, the  
376 transposons with hybridization sequences were inserted in the long DNA molecules  
377 approximately every 200-1000 base pairs. The transposon integrated DNAs was then  
378 mixed with beads that each contained an adapter sequence. A unique barcode was  
379 shared by all adapters on each bead with a PCR primer site and a capture sequence  
380 that is complementary to the sequences on the integrated transposons. When the  
381 genomic DNA was captured to the beads, the transposons were ligated to the barcode  
382 adapters. After a few additional library-processing steps, the co-barcoded  
383 sub-fragments were sequenced on the BGISEQ-500 sequencer.

384

### 385 ***Reads filtering, genome size estimation and genome assembly***

386 We generated a total of 1,223,801,322 million raw pair-end co-barcoding reads of  
387 122.4 Gb. To obtain high-quality genome, SOAPnuke (v2.2) [24] was performed to  
388 filter low-quality reads (>40% low-quality bases, Q<7), PCR duplications, or adapter  
389 contaminations. After that, 753,357,182 clean pair-end reads remained. Based on the  
390 17-mer analysis, the Mekong tiger perch genome size was estimated to be 623 Mb.  
391 Supernova assembler v 2.0.1(10X Genomics, Pleasanton, CA) were used to construct  
392 contig and scaffold, followed by gaps closing using GapCloser (v1.2) [13].

393

### 394 ***Genes structure and function annotation***

395 We used both *de novo* approaches and homology-based approaches to predict repeat  
396 elements in *D. undecimradiatus* genome. Firstly, we aligned our genome against the  
397 Repbase database [25] at both protein and DNA levels by using RepeatMasker (v4.0.5)  
398 and RepeatProteinMasker (v4.0.5) [26] to identify transcriptional elements (TEs).  
399 Secondly, we used RepeatModeler (v1.0.8)[27] and LTR-FINDER (v1.0.6)[28] to  
400 implement *de novo* repeat annotation. Next, we used RepeatMasker to complete  
401 repeat elements identification and classification. Lastly, we combined and classified

402 the above results. We masked the repeats in *D. undecimradiatus* genome for the  
403 subsequent gene finding.

404 For homology-based annotation, we downloaded protein sequences of  
405 *Dicentrarchus labrax*, *Labrus bergylta*, *Larimichthys crocea*, and *Gasterosteus*  
406 *aculeatus* from NCBI (<https://www.ncbi.nlm.nih.gov/>) and Ensembl  
407 (<http://ensemblgenomes.org/>). We aligned these sequence to *D. undecimradiatus*  
408 genome using BLAST[29] with an E-value cutoff of  $1e^{-5}$  and the matched length  
409 coverage >30% to identify homologous genes. Based on the aligned result, we used  
410 GeneWise (v2.4.1) [30] to predict gene models. Furthermore, we used AUGUSTUS  
411 (v3.1) [31] and GENSCAN(v2009) [32] for *de novo* annotation with default  
412 parameters and zebrafish data setting as a training set of AUGUSTUS. Lastly, we  
413 integrated all above gene models by EVM [33]. We used BUSCO (v 3.0.2) [34] to  
414 assessment gene annotation integrity with three different databases, including  
415 vertebrata (v9), metazoan (v9), and vertebrata (v9).

416

#### 417 ***Gene functional annotation***

418 In order to perform gene functional annotation, we aligned above gene sets against  
419 Kyoto Encyclopedia of Genes and Genome (KEGG v87.0) [35], and NR (v84)[36]  
420 databases by blastp (E-value $\leq 1e^{-5}$ ) to identify genes with similar functions. For  
421 identifying gene motifs and domains and obtaining Gene ontology (GO) terms [37],  
422 we aligned our predicted genes against ProDom [38], Pfam [39], SMART [40],  
423 PANTHER [41], and PROSITE [42] using InterProScan [43].

424

#### 425 ***ncRNA annotation***

426 Five types of ncRNA (Non-coding RNA), including tRNA, snRNA, miRNA, snRNA  
427 and, rRNA were predicted. We used tRNAscan-SE (v1.3.1) to predict tRNA in our  
428 genome with the default parameters. The genome was aligned against Rfam(v12.0)  
429 (Nawrocki E P et al., 2015) database and then we used infernal (v1.1.1) (Nawrocki E  
430 P & Eddy S R, 2013) to infer snRNA and miRNA based on mapping result. We  
431 aligned vertebrate rRNA database against *D.undecimradiatus* genome to predict  
432 rRNA.



433

#### 434 ***CpG islands identification***

435 The CpG islands (CGIs), which are clusters of CpGs in CG-rich regions, were  
436 identified using CpGIScan with the parameters “--length 500 --gcc 55 --oe 0.65”[44].

#### 437 ***Comparative genome analysis***

438 We download the annotation files of 8 species including *Dicentrarchus labrax*,  
439 *Gasterosteus aculeatus*, *Labrus bergylta*, *Labrus bergylta*, *Notothenia coriiceps*,  
440 *Oplegnathus fasciatus*, *Larimichthys crocea*, and *Takifugu rubripes* from NCBI or  
441 Ensembl database (Suppl. Table 5). The longest transcript was extracted for each gene.  
442 We filtered error sequences that didn't have enough sequence length, with termination  
443 codon in the middle, and with sequence length not divisible by 3 to obtain raw gene  
444 sets for each species. TreeFam (v4.0) [45] was used to identify gene families.

445

446 We concatenated single-copy genes into a supergene for each species and identified  
447 fourfold degenerate sites within each supergene to construct a phylogenetic tree using  
448 RAxML (v8.2.12) [46] with GTRCATX nucleotide substitution model with  
449 parameters as “-f a -x 12345 -p 12345”. Then by using the split time between  
450 *Gasterosteus aculeatus* and *Larimichthys crocea*, *Dicentrarchus labrax* and  
451 *Larimichthys crocea*, and *Notothenia coriiceps* and *Gasterosteus aculeatus* from  
452 timetree (<http://www.timetree.org/>) [47] as the reference time points, we estimated the  
453 divergent time between each species by MCMCtree from the PAML package with  
454 default parameters [48].

455

#### 456 ***Gene family cluster and expansion and contraction analysis***

457 Expansion and contraction of each gene family were identified by Café (v2.1) [49]  
458 based on divergence time tree. To obtain the potential functions of the gene families,  
459 the number of different KO terms was counted for each gene family. The functions of  
460 the gene families were assigned by the corresponding KO terms of more than half  
461 counts or the highest count. The KEGG pathways involved by KO terms were  
462 extracted for further functional analysis. For the phylogenetic tree of the gene family,

463 the CDS sequences were fetched to construct ML tree using RAxML (v8.2.12) [46].

464

### 465 ***Synten analysis***

466 The synten analysis of *D. undecimradiatus* against *L. crocea* and *T. rubripes* was  
467 performed on both whole-genome nucleotide level and gene level. On nucleotide level,  
468 we used Lastz (v1.02.00) [50] to identify synten blocks with parameters “T=2 C=2  
469 H=2000 Y=3400 L=6000 K=2200”, and aligned blocks less than 1 kb were filtered.

470 On gene level, we used JCVI (v0.8.12) [51] to identify synten genes in two  
471 combinations based on CDS. The JCVI carried out sequence alignment based on  
472 Lastal (v979) with parameters “-u 0 -P 48 -i3G -f BlastTab”. The JCVI filtered the  
473 blast result based on C-score ( $C\text{-score}(A,B) = \text{score}(A,B) / \max(\text{best score for A, best}$   
474  $\text{score for B})$ ) with parameters “C-score  $\geq 0.70$  tandem\_Nmax=10”. We also filtered  
475 out the blocks spanning less than 30 genes on the *D. undecimradiatus* genome.

476

### 477 ***Population demographic history inference***

478 The history of effective population size was reconstructed using PSMC (v0.6.5-r67)  
479 [52]. Diploid genome reference for the individual were constructed using SAMtools  
480 and BCFtools [53] with the parameters of “samtools mpileup -C30” and “vcfutils.pl  
481 vcf2fq -d 10 -D 100”. The demographic history was inferred using PSMC with “-N25  
482 -t15 -r5 -p 4+25\*2+4+6” parameters. The estimated generation time (g) and mutation  
483 rate per generation per site ( $\mu$ ) were set to 1 and 2.5e-8.

484

### 485 **References**

- 486 24. Chen, Y., et al., *SOAPnuke: a MapReduce acceleration-supported software for integrated*  
487 *quality control and preprocessing of high-throughput sequencing data*. *Gigascience*, 2017.  
488 7(1): p. gix120.
- 489 25. Bao, W., K.K. Kojima, and O. Kohany, *Rebase Update, a database of repetitive elements in*  
490 *eukaryotic genomes*. *Mobile DNA*, 2015. 6(1): p. 11.
- 491 26. Tarailo-Graovac, M. and N. Chen, *Using RepeatMasker to identify repetitive elements in*  
492 *genomic sequences*. *Current protocols in bioinformatics*, 2009. 25(1): p. 4.10. 1-4.10. 14.
- 493 27. Smith, A. and R. Hubley. *RepeatModeler Open-1.0*. 2008; Available from:  
494 <http://www.repeatmasker.org>.

- 495 28. Xu, Z. and H. Wang, *LTR\_FINDER: an efficient tool for the prediction of full-length LTR*  
496 *retrotransposons*. Nucleic Acids Research, 2007. **35**(Web Server issue): p. W265-8.
- 497 29. Altschul, S.F., et al., *Basic local alignment search tool*. Journal of Molecular Biology, 1990.  
498 **215**(3): p. 403-10.
- 499 30. Birney, E., M. Clamp, and R. Durbin, *GeneWise and Genomewise*. Genome Research, 2004.  
500 **14**(5): p. 988-95.
- 501 31. Stanke, M., et al., *AUGUSTUS: ab initio prediction of alternative transcripts*. Nucleic Acids  
502 Research, 2006. **34**(Web Server issue): p. W435-9.
- 503 32. Burge, C. and S. Karlin, *Prediction of complete gene structures in human genomic DNA*.  
504 Journal of Molecular Biology, 1997. **268**(1): p. 78-94.
- 505 33. Haas, B.J., et al., *Automated eukaryotic gene structure annotation using EVIDENCEModeler and*  
506 *the Program to Assemble Spliced Alignments*. Genome Biology, 2008. **9**(1): p. R7.
- 507 34. Simão, F.A., et al., *BUSCO: assessing genome assembly and annotation completeness with*  
508 *single-copy orthologs*. Bioinformatics, 2015. **31**(19): p. 3210-3212.
- 509 35. Kanehisa, M. and S. Goto, *KEGG: kyoto encyclopedia of genes and genomes*. Nucleic Acids  
510 Research, 2000. **28**(1): p. 27-30.
- 511 36. Pruitt, K.D., T. Tatusova, and D.R. Maglott, *NCBI reference sequences (RefSeq): a curated*  
512 *non-redundant sequence database of genomes, transcripts and proteins*. Nucleic Acids  
513 Research, 2007. **35**(Database issue): p. D61-5.
- 514 37. Ashburner, M., et al., *Gene ontology: tool for the unification of biology. The Gene Ontology*  
515 *Consortium*. Nature Genetics, 2000. **25**(1): p. 25-9.
- 516 38. Bru, C., et al., *The ProDom database of protein domain families: more emphasis on 3D*.  
517 Nucleic Acids Research, 2005. **33**(Database issue): p. D212-5.
- 518 39. Punta, M., et al., *The Pfam protein families database*. Nucleic Acids Research, 2012.  
519 **40**(Database issue): p. D290-301.
- 520 40. Ponting, C.P., et al., *SMART: identification and annotation of domains from signalling and*  
521 *extracellular protein sequences*. Nucleic Acids Research, 1999. **27**(1): p. 229-32.
- 522 41. Mi, H., et al., *The PANTHER database of protein families, subfamilies, functions and*  
523 *pathways*. Nucleic Acids Research, 2005. **33**(Database issue): p. D284-8.
- 524 42. Hulo, N., et al., *The PROSITE database*. Nucleic Acids Research, 2006. **34**(Database issue): p.  
525 D227-30.
- 526 43. Zdobnov, E.M. and R. Apweiler, *InterProScan—an integration platform for the*  
527 *signature-recognition methods in InterPro*. Bioinformatics  
528 2001. **17**(9): p. 847-848.
- 529 44. Fan, Z., et al., *CpGIScan: an ultrafast tool for CpG islands identification from genome*  
530 *sequence*. Current Bioinformatics, 2017. **12**(2): p. 181-184.
- 531 45. Li, H., et al., *TreeFam: a curated database of phylogenetic trees of animal gene families*.  
532 Nucleic Acids Research, 2006. **34**(Database issue): p. D572-80.
- 533 46. Stamatakis, A., *RAxML version 8: a tool for phylogenetic analysis and post-analysis of large*  
534 *phylogenies*. Bioinformatics, 2014. **30**(9): p. 1312-3.
- 535 47. Kumar, S., et al., *TimeTree: A Resource for Timelines, Timetrees, and Divergence Times*.  
536 Molecular Biology and Evolution, 2017. **34**(7): p. 1812-1819.
- 537 48. Yang, Z., *PAML 4: phylogenetic analysis by maximum likelihood*. Molecular Biology and  
538 Evolution, 2007. **24**(8): p. 1586-91.

- 539 49. Hahn, M.W., J.P. Demuth, and S.G. Han, *Accelerated rate of gene gain and loss in primates*.  
540 *Genetics*, 2007. **177**(3): p. 1941-9.
- 541 50. Harris, R.S., *Improved pairwise Alignment of genomic DNA*. 2007.
- 542 51. Tang, H., et al., *bcftools: BCF to VCF utility libraries*. Zenodo, 2015: p. 10.5281/zenodo.31631.
- 543 52. Li, H. and R. Durbin, *Inference of human population history from individual whole-genome*  
544 *sequences*. *Nature*, 2011. **475**(7357): p. 493-6.
- 545 53. Li, H., et al., *The Sequence Alignment/Map format and SAMtools*. *Bioinformatics*, 2009.  
546 **25**(16): p. 2078-9.

547  
548

#### 549 ***Data available***

550 The sequencing reads of Mekong tiger perch in this study have been deposited in  
551 NCBI Sequence Read Archive (SRA) under BioProject accession PRJNA574247. The  
552 datasets reported in this study are also available in the CNGB under accession number  
553 CNP0000691.

554

#### 555 ***Acknowledgements***

556 This work was financially supported by the special funding of “Blue granary”  
557 scientific and technological innovation of China (2018YFD0900301-05) and Special  
558 Fund for Marine Economic Development of Fujian Province (ZHHY-2019-3). We  
559 also thanks for the technical support of stLFR library construction and sequencing  
560 from China National Genebank.

#### 561 ***Author Contributions***

562 X. L., G. F. and H. Z. conceived the project. S. L. and G. F. supervised the study. M.  
563 Z. contributed to sample collections. S. S., Y. W., L. L., and X. H. performed  
564 bioinformatics analyses. S. S, Y.W., G. F., X. L., and X. D. wrote the manuscript with  
565 help from all co-authors.

566

#### 567 ***Competing Interests***

568 The authors declare no competing interests.

569

570

571

572 **Supplementary Figures and Tables**

573

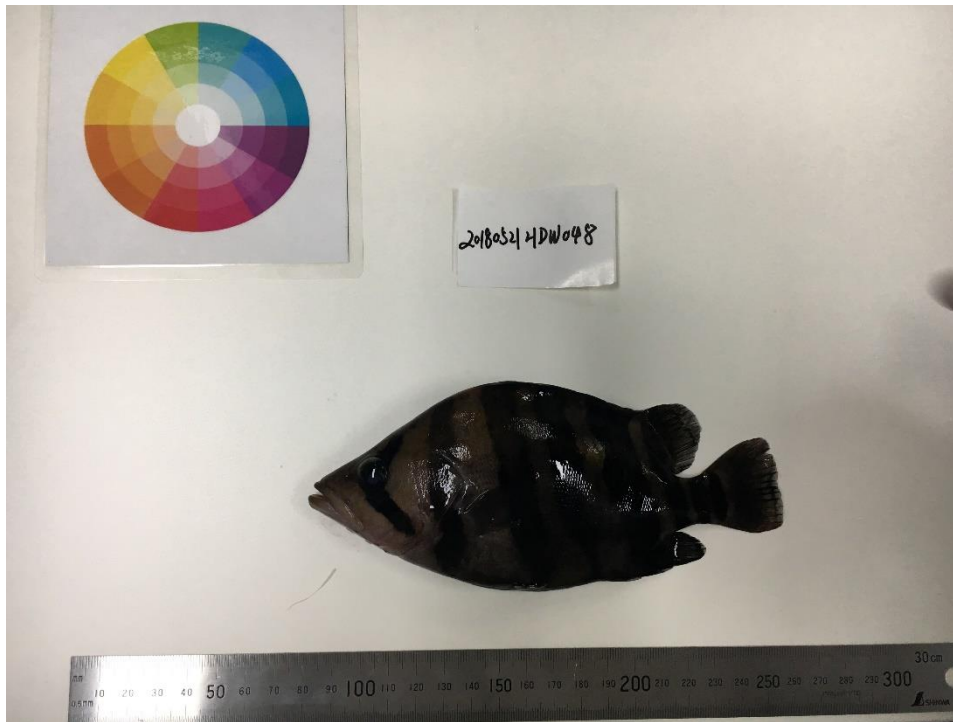

574

575 **Supplementary figure 1.** The photo of the Mekong tiger perch captured in Mekong  
576 river.

577

578

579

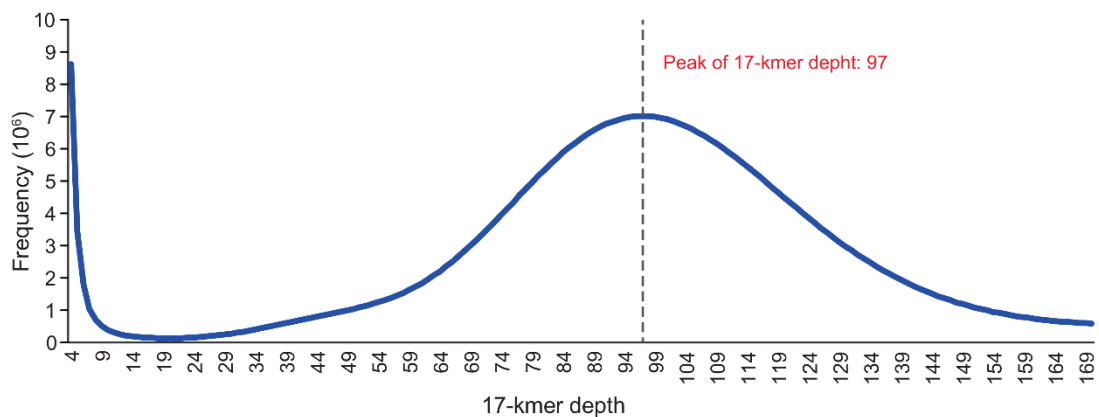

580

581 **Supplementary figure 2.** Kmer (K=17) frequency at different Kmer depth. The total  
582 number of Kmer is 60,437,782,622, the Kmer depth peak at 97, and the reads  
583 sequencing length was 100, so that the genome size was estimated 623,069,923bp.

584

585 **Supplementary table 1.** The details of longest 71 scaffolds.

| <b>scaffold ID</b> | <b>Length (bp)</b> | <b>GC content (%)</b> | <b>N_ratio (%)</b> |
|--------------------|--------------------|-----------------------|--------------------|
| scaffold22         | 39,306,008         | 42.33                 | 1.58               |
| scaffold23         | 24,901,081         | 42.33                 | 1.97               |
| scaffold24         | 23,317,972         | 42.03                 | 0.87               |
| scaffold63         | 22,660,142         | 42.41                 | 1.76               |
| scaffold26         | 19,767,337         | 41.45                 | 0.89               |
| scaffold27         | 19,537,586         | 42.15                 | 1.03               |
| scaffold58         | 17,534,777         | 41.68                 | 2.25               |
| scaffold25         | 17,129,097         | 41.35                 | 2.02               |
| scaffold28         | 15,606,803         | 41.60                 | 0.76               |
| scaffold45         | 15,041,297         | 41.93                 | 1.28               |
| scaffold60         | 13,384,554         | 42.11                 | 0.81               |
| scaffold61         | 13,186,598         | 42.71                 | 1.04               |
| scaffold77         | 11,679,837         | 42.19                 | 2.24               |
| scaffold79         | 11,352,832         | 42.26                 | 0.96               |
| scaffold59         | 10,986,376         | 41.77                 | 1.75               |
| scaffold88         | 10,659,222         | 41.96                 | 1.16               |
| scaffold89         | 9,983,168          | 43.64                 | 3.77               |
| scaffold62         | 9,730,178          | 42.24                 | 1.24               |
| scaffold64         | 9,455,329          | 41.09                 | 0.99               |
| scaffold80         | 9,009,409          | 41.98                 | 1.13               |
| scaffold90         | 8,890,068          | 44.17                 | 5.80               |
| scaffold66         | 7,986,709          | 42.51                 | 0.72               |
| scaffold67         | 7,981,977          | 42.51                 | 0.72               |
| scaffold155        | 7,882,590          | 44.18                 | 2.10               |
| scaffold76         | 7,221,551          | 42.34                 | 0.79               |
| scaffold83         | 7,024,340          | 43.41                 | 1.36               |
| scaffold129        | 7,004,772          | 43.25                 | 3.18               |
| scaffold86         | 6,951,544          | 44.19                 | 2.53               |
| scaffold87         | 6,939,792          | 42.63                 | 1.33               |
| scaffold85         | 6,732,700          | 43.19                 | 2.76               |
| scaffold75         | 6,668,441          | 40.74                 | 0.60               |
| scaffold102        | 6,529,773          | 42.51                 | 1.49               |
| scaffold78         | 6,505,070          | 40.03                 | 1.04               |
| scaffold110        | 6,218,238          | 42.57                 | 2.73               |
| scaffold65         | 6,149,668          | 41.30                 | 0.92               |
| scaffold81         | 6,042,282          | 40.32                 | 0.84               |
| scaffold107        | 5,552,807          | 43.61                 | 1.57               |
| scaffold82         | 5,383,449          | 45.41                 | 3.42               |
| scaffold108        | 5,037,774          | 42.28                 | 1.01               |
| scaffold111        | 4,837,472          | 43.64                 | 1.99               |
| scaffold105        | 4,507,353          | 42.91                 | 1.23               |
| scaffold101        | 4,379,686          | 46.21                 | 5.84               |

|               |           |       |      |
|---------------|-----------|-------|------|
| scaffold176   | 4,245,196 | 46.52 | 3.11 |
| scaffold125   | 4,183,443 | 46.18 | 1.54 |
| scaffold84    | 3,961,987 | 40.27 | 0.99 |
| scaffold106   | 3,649,163 | 43.70 | 1.26 |
| scaffold148   | 3,238,164 | 41.03 | 2.37 |
| scaffold147   | 3,070,712 | 47.24 | 2.74 |
| scaffold103   | 2,911,789 | 45.84 | 9.75 |
| scaffold69    | 2,816,955 | 45.17 | 5.65 |
| scaffold68    | 2,814,068 | 45.16 | 5.64 |
| scaffold131   | 2,714,138 | 42.91 | 2.44 |
| scaffold186   | 2,711,499 | 39.58 | 0.54 |
| scaffold200   | 2,366,470 | 46.18 | 4.82 |
| scaffold113   | 2,352,837 | 42.56 | 3.55 |
| scaffold104   | 2,165,782 | 41.93 | 0.79 |
| scaffold201   | 2,162,358 | 43.22 | 0.86 |
| scaffold122   | 2,118,146 | 46.78 | 8.16 |
| scaffold133   | 2,111,711 | 41.92 | 4.03 |
| scaffold18494 | 1,965,245 | 45.72 | 4.53 |
| scaffold18500 | 1,963,021 | 45.71 | 4.53 |
| scaffold124   | 1,863,279 | 46.42 | 5.63 |
| scaffold112   | 1,679,604 | 41.45 | 0.25 |
| scaffold109   | 1,675,575 | 42.10 | 2.24 |
| scaffold137   | 1,624,607 | 42.65 | 3.82 |
| scaffold173   | 1,554,608 | 43.17 | 0.68 |
| scaffold130   | 1,511,149 | 41.63 | 2.51 |
| scaffold185   | 1,502,512 | 43.66 | 3.3  |
| scaffold136   | 1,485,443 | 43.24 | 2.61 |
| scaffold127   | 1,411,413 | 46.76 | 6.74 |
| scaffold135   | 1,407,639 | 47.20 | 6.86 |

---

587 **Supplementary table 2.** Repeat annotation of the Mekong tiger perch genome.

| Type    | Rebase TEs  |             | TE proteins |             | De novo     |             | Combined TEs |             |
|---------|-------------|-------------|-------------|-------------|-------------|-------------|--------------|-------------|
|         | Length (bp) | % in genome | Length (bp) | % in genome | Length (bp) | % in genome | Length (bp)  | % in genome |
| DNA     | 16,506,661  | 2.77        | 1,633,161   | 0.27        | 30,824,896  | 5.18        | 36,324,964   | 6.11        |
| LINE    | 6,821,950   | 1.15        | 4,071,954   | 0.68        | 12,961,236  | 2.18        | 16,349,136   | 2.75        |
| SINE    | 662,765     | 0.11        | -           | 0.00        | 908,953     | 0.15        | 1,152,466    | 0.19        |
| LTR     | 6,332,971   | 1.06        | 1,837,976   | 0.31        | 9,602,730   | 1.61        | 14,084,966   | 2.37        |
| Other   | 4,319       | 0.00        | -           | 0.00        | -           | 0.00        | 4,319        | 0.00        |
| Unknown | -           | 0.00        | -           | 0.00        | 19,939,915  | 3.35        | 19,939,915   | 3.35        |
| Total   | 26,352,522  | 4.43        | 7,536,991   | 1.27        | 65,356,559  | 10.98       | 71,231,464   | 11.97       |

588

589 **Supplementary table 3.** The statistics of predicted genes using different methods.

| Method           | Software/Species              | Number of predicted genes | Average gene length (bp) | Average CDS length (bp) | Average exon number | Average exon length (bp) | Average intron length (bp) |
|------------------|-------------------------------|---------------------------|--------------------------|-------------------------|---------------------|--------------------------|----------------------------|
| <i>ab initio</i> | Augustus                      | 26,826                    | 11324.91                 | 1428.76                 | 8.21                | 173.94                   | 1371.75                    |
|                  | Genscan                       | 29,524                    | 14516.5                  | 1596.21                 | 9.18                | 173.87                   | 1579.41                    |
| Homolog-based    | <i>Danio rerio</i>            | 44,300                    | 19786.39                 | 1526.41                 | 8.79                | 173.62                   | 2343.59                    |
|                  | <i>Dicentrarchus labrax</i>   | 28,264                    | 12505.75                 | 1483.79                 | 8.13                | 182.44                   | 1545.24                    |
|                  | <i>Labrus bergylta</i>        | 39,412                    | 21851.38                 | 1494.87                 | 8.67                | 172.36                   | 2653.06                    |
|                  | <i>Larimichthys crocea</i>    | 47,139                    | 19654.28                 | 2187.95                 | 12.62               | 173.42                   | 1503.63                    |
|                  | <i>Gasterosteus aculeatus</i> | 28,975                    | 10277.3                  | 1456.49                 | 8.92                | 163.2                    | 1113.07                    |
| Combined         | EVM                           | 29,150                    | 13758.59                 | 1510.42                 | 9.04                | 167.03                   | 1522.83                    |



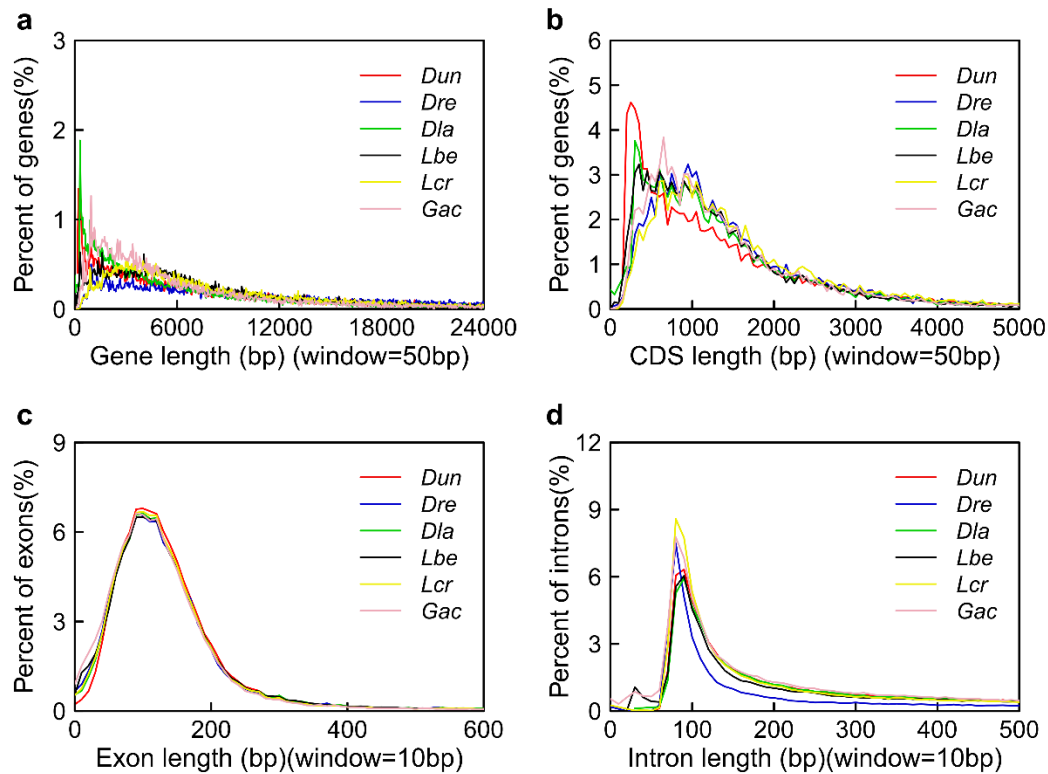

590

591 **Supplementary figure 3.** The distribution of gene length, CDS length, exon length  
 592 and intron length of the Mekong tiger perch compared to related speices. Scientific  
 593 names are abbreviated as follows: **Dun**, *Datnioides undecimradiatus*; **Dre**, *Danio*  
 594 *rerio*; **Dla**, *Dicentrarchus labrax*; **Lbe**, *Labrus bergylta*; **Lcr**, *Larimichthys crocea*;  
 595 **Gac**, *Gasterosteus aculeatus*.

596

597 **Supplementary table 4.** ncRNA annotation of the Mekong tiger perch genome.

| Type  | Sub-type | Copy number | Average length (bp) | Total length (bp) | % of genome |
|-------|----------|-------------|---------------------|-------------------|-------------|
| miRNA | -        | 260         | 82.73               | 21509             | 0.003615    |
| tRNA  | -        | 753         | 76.03               | 57248             | 0.009622    |
| rRNA  | rRNA     | 98          | 184.79              | 18109             | 0.003044    |
|       | 18S      | 12          | 388.33              | 4660              | 0.000783    |
|       | 28S      | 47          | 215.021             | 10106             | 0.001699    |
|       | 5.8S     | 7           | 117.14              | 820               | 0.000138    |
|       | 5S       | 32          | 78.84               | 2523              | 0.000424    |
| snRNA | snRNA    | 261         | 126.20              | 32938             | 0.005536    |
|       | CD-box   | 117         | 94.60               | 11068             | 0.001860    |
|       | HACA-box | 77          | 154.45              | 11893             | 0.001999    |
|       | splicing | 58          | 140.03              | 8122              | 0.001365    |

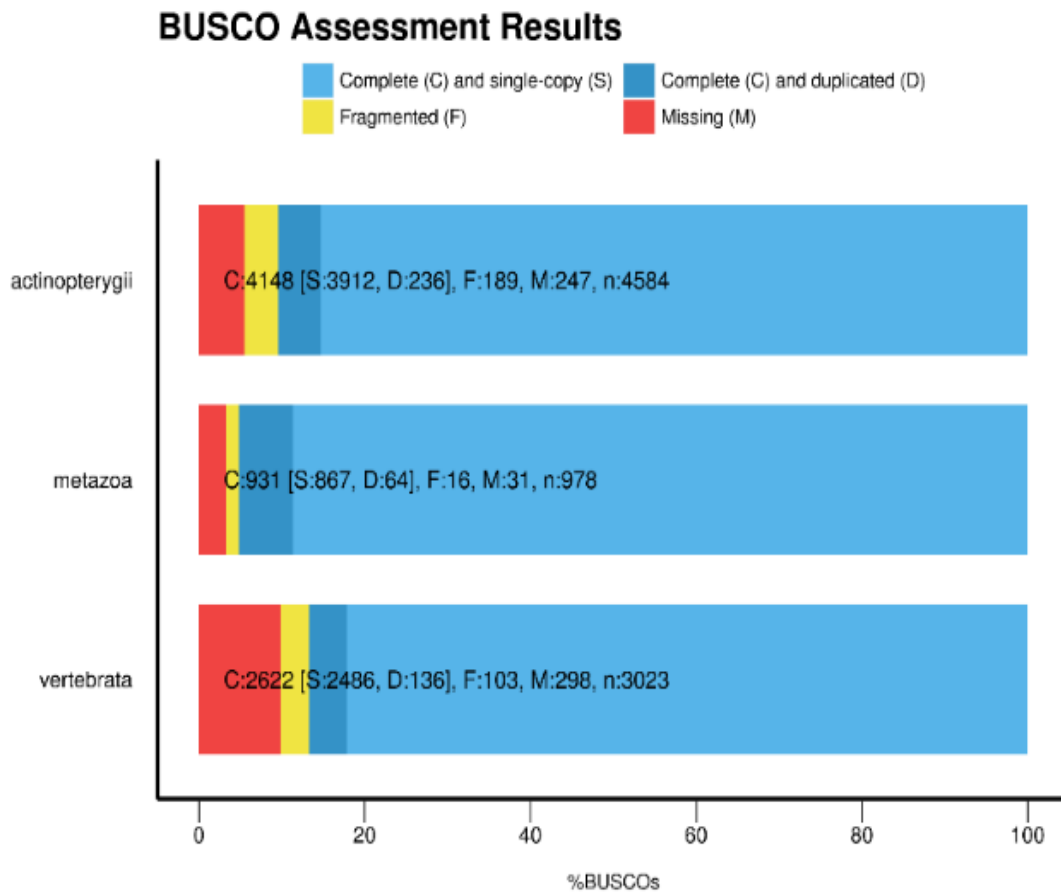

598

599 **Supplementary figure 4.** The completeness of predicted genes sets was evaluated by  
600 BUSCO based on three different databases, including Actinopterygii (v9), metazoan  
601 (v9) and vertebrata (v9).

602 **Supplementary table 5.** Genes annotated on mitochondrial genome.

| Mitochondrial genome | Start | End  | Length(bp) | Direction | Type | Gene name | Gene product                    | Occurred Counts |
|----------------------|-------|------|------------|-----------|------|-----------|---------------------------------|-----------------|
| C515351              | 134   | 202  | 69         | +         | tRNA | trnF(gaa) | tRNA-Phe                        | 1               |
| C515351              | 202   | 1170 | 969        | +         | rRNA | s-rRNA    | 12S ribosomal RNA               | 1               |
| C515351              | 1170  | 1242 | 73         | +         | tRNA | trnV(uac) | tRNA-Val                        | 1               |
| C515351              | 1262  | 2954 | 1693       | +         | rRNA | l-rRNA    | 16S ribosomal RNA               | 1               |
| C515351              | 2954  | 3028 | 75         | +         | tRNA | trnL(uaa) | tRNA-Leu                        | 2               |
| C515351              | 3028  | 4003 | 976        | +         | CDS  | ND1       | NADH dehydrogenase subunit 1    | 1               |
| C515351              | 4008  | 4079 | 72         | +         | tRNA | trnI(gau) | tRNA-Ile                        | 1               |
| C515351              | 4078  | 4149 | 72         | -         | tRNA | trnQ(uug) | tRNA-Gln                        | 1               |
| C515351              | 4148  | 4220 | 73         | +         | tRNA | trnM(cau) | tRNA-Met                        | 1               |
| C515351              | 4220  | 5267 | 1048       | +         | CDS  | ND2       | NADH dehydrogenase subunit 2    | 1               |
| C515351              | 5266  | 5338 | 73         | +         | tRNA | trnW(uca) | tRNA-Trp                        | 1               |
| C515351              | 5338  | 5407 | 70         | -         | tRNA | trnA(ugc) | tRNA-Ala                        | 1               |
| C515351              | 5408  | 5481 | 74         | -         | tRNA | trnN(guu) | tRNA-Asn                        | 1               |
| C515351              | 5516  | 5585 | 70         | -         | tRNA | trnC(gca) | tRNA-Cys                        | 1               |
| C515351              | 5585  | 5655 | 71         | -         | tRNA | trnY(gua) | tRNA-Tyr                        | 1               |
| C515351              | 5656  | 7207 | 1552       | +         | CDS  | COX1      | cytochrome c oxidase subunit I  | 1               |
| C515351              | 7207  | 7278 | 72         | -         | tRNA | trnS(uga) | tRNA-Ser                        | 2               |
| C515351              | 7281  | 7354 | 74         | +         | tRNA | trnD(guc) | tRNA-Asp                        | 1               |
| C515351              | 7362  | 8061 | 700        | +         | CDS  | COX2      | cytochrome c oxidase subunit II | 1               |
| C515351              | 8053  | 8128 | 76         | +         | tRNA | trnK(uuu) | tRNA-Lys                        | 1               |

|         |       |       |      |   |      |           |                                  |   |
|---------|-------|-------|------|---|------|-----------|----------------------------------|---|
| C515351 | 8129  | 8297  | 169  | + | CDS  | ATP8      | ATP synthase F0 subunit 8        | 1 |
| C515351 | 8314  | 8971  | 658  | + | CDS  | ATP6      | ATP synthase F0 subunit 6        | 1 |
| C515351 | 8970  | 9756  | 787  | + | CDS  | COX3      | cytochrome c oxidase subunit III | 1 |
| C515351 | 9755  | 9827  | 73   | + | tRNA | trnG(ucc) | tRNA-Gly                         | 1 |
| C515351 | 9827  | 10178 | 352  | + | CDS  | ND3       | NADH dehydrogenase subunit 3     | 1 |
| C515351 | 10176 | 10245 | 70   | + | tRNA | trnR(ucg) | tRNA-Arg                         | 1 |
| C515351 | 10245 | 10542 | 298  | + | CDS  | ND4L      | NADH dehydrogenase 4L            | 1 |
| C515351 | 10535 | 11921 | 1387 | + | CDS  | ND4       | NADH dehydrogenase 4             | 1 |
| C515351 | 11916 | 11984 | 69   | + | tRNA | trnH(gug) | tRNA-His                         | 1 |
| C515351 | 11984 | 12051 | 68   | + | tRNA | trnS(gcu) | tRNA-Ser                         | 2 |
| C515351 | 12055 | 12128 | 74   | + | tRNA | trnL(uag) | tRNA-Leu                         | 2 |
| C515351 | 12128 | 13967 | 1840 | + | CDS  | ND5       | NADH dehydrogenase subunit 5     | 1 |
| C515351 | 13963 | 14485 | 523  | - | CDS  | ND6       | NADH dehydrogenase 6             | 1 |
| C515351 | 14486 | 14555 | 70   | - | tRNA | trnE(uuc) | tRNA-Glu                         | 1 |
| C515351 | 14560 | 15721 | 1162 | + | CDS  | CYTB      | cytochrome b                     | 1 |
| C515351 | 15701 | 15771 | 71   | + | tRNA | trnT(ugu) | tRNA-Thr                         | 1 |
| C515351 | 15770 | 15840 | 71   | - | tRNA | trnP(ugg) | tRNA-Pro                         | 1 |

---

603

604

605

606 **Supplementary table 6.** Relationship GC with repeat content.

| Pairs                           | Pearson r | Lower 95% CI | Upper 95% CI | P-value   |
|---------------------------------|-----------|--------------|--------------|-----------|
| CGI density vs. GC content      | 0.643     | 0.666        | 0.688        | 4.83E-304 |
| CGI density vs. Gene density    | 0.252     | 0.290        | 0.326        | 4.37E-47  |
| CGI density vs. Repeat content  | 0.329     | 0.364        | 0.399        | 1.75E-75  |
| GC content vs. Gene density     | 0.135     | 0.174        | 0.213        | 1.42E-17  |
| GC content vs. Repeat content   | 0.108     | 0.147        | 0.187        | 5.27E-13  |
| Gene density vs. Repeat content | -0.082    | -0.042       | -0.002       | 4.16E-02  |

607

608

609 **Supplementary table 7.** Nine species used in our study.

| Three letter code | Scientific name                   | Common name               | Order             | Data source | Accession ID    |
|-------------------|-----------------------------------|---------------------------|-------------------|-------------|-----------------|
| <i>Ofa</i>        | <i>Oplegnathus fasciatus</i>      | barred knifejaw           | Centrarchiformes  | NCBI        | GCA_003416845.1 |
| <i>Lbe</i>        | <i>Labrus bergylta</i>            | ballan wrasse             | Labriformes       | NCBI        | GCF_900080235.1 |
| <i>Dun</i>        | <i>Datnioides undecimradiatus</i> | Mekong tiger perch        | Lobotiformes      | our study   | our study       |
| <i>Dla</i>        | <i>Dicentrarchus labrax</i>       | European seabass          | Moronidae         | NCBI        | GCA_000689215.1 |
| <i>Gac</i>        | <i>Gasterosteus aculeatus</i>     | three-spined stickleback  | Perciformes       | NCBI        | GCA_000180675.1 |
| <i>Neo</i>        | <i>Notothenia coriiceps</i>       | black rockcod             | Perciformes       | NCBI        | GCF_000735185.1 |
| <i>Ssc</i>        | <i>Sebastes schlegelii</i>        | Schlegel's black rockfish | Perciformes       | NCBI        | GCA_004335315.1 |
| <i>Lcr</i>        | <i>Larimichthys crocea</i>        | large yellow croaker      | Sciaenidae        | NCBI        | GCF_000972845.2 |
| <i>Tru</i>        | <i>Takifugu rubripes</i>          | torafugu                  | Tetraodontiformes | NCBI        | GCF_000180615.1 |

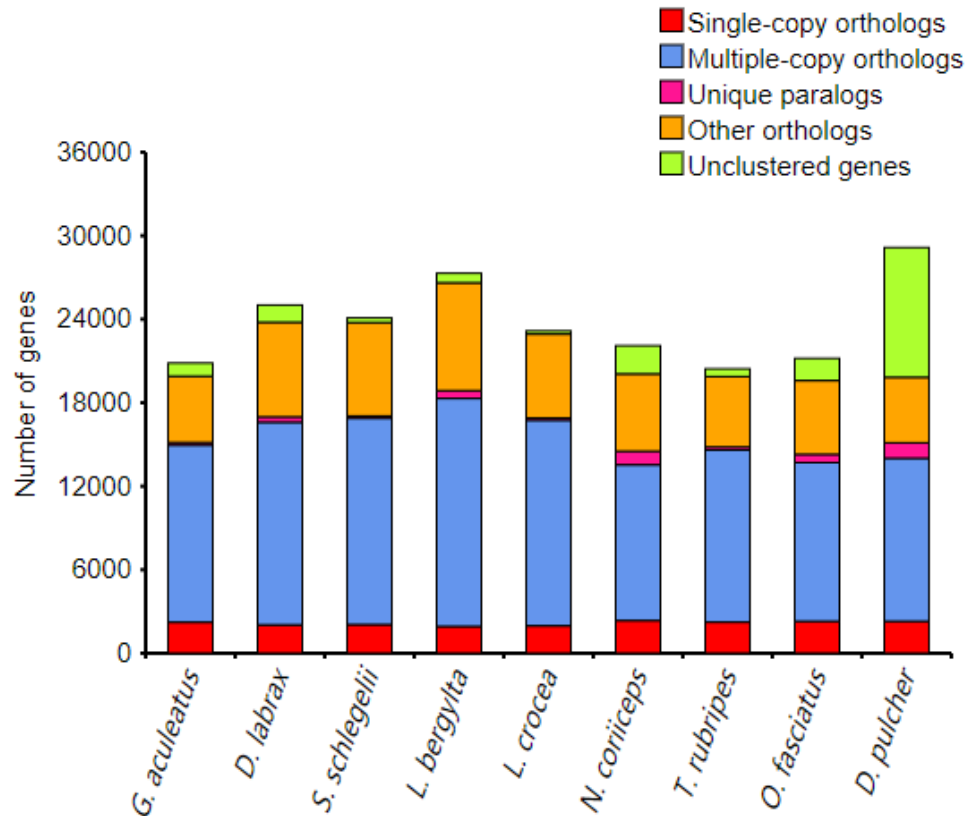

610

611 **Supplementary figure 5.** The genes number of five type of gene families for nine  
 612 species used in the analysis of comparative genomes.

613

614 **Supplementary table 8.** The statistics of gene family clusters.

| Spec<br>ies | Genes*<br>number | Un-clustered<br>genes number | Families<br>number | Unique family's<br>number | Average genes<br>per family |
|-------------|------------------|------------------------------|--------------------|---------------------------|-----------------------------|
| <i>Gac</i>  | 20,862           | 1,107                        | 8,792              | 19                        | 2.25                        |
| <i>Dla</i>  | 25,020           | 1,423                        | 10,090             | 77                        | 2.34                        |
| <i>Ssc</i>  | 24,094           | 425                          | 9,745              | 21                        | 2.43                        |
| <i>Lbe</i>  | 27,305           | 888                          | 10,031             | 133                       | 2.63                        |
| <i>Lcr</i>  | 23,163           | 315                          | 9,967              | 30                        | 2.29                        |
| <i>Nco</i>  | 22,099           | 2,713                        | 9,752              | 139                       | 1.99                        |
| <i>Tru</i>  | 20,434           | 704                          | 9,359              | 37                        | 2.11                        |
| <i>Ofa</i>  | 21,901           | 2,023                        | 9,481              | 81                        | 2.10                        |
| <i>Dun</i>  | 26,894           | 8,260                        | 9,208              | 378                       | 2.02                        |

615 \* Pseudo-genes (stop-gained in middle) were filtered out, and the genes with protein length <50  
 616 were also removed.

617 **Supplementary table 9.** Synteny of alignment statistics at whole-genome nucleotide  
 618 sequences level.

| <b>Species aligned to</b>    | <b>Cutoff of alignment length</b> | <b>Synteny coverage (%)</b> | <b>Alignment number</b> | <b>Average alignment length (bp)</b> | <b>Median alignment length (bp)</b> | <b>Min alignment length (bp)</b> | <b>Max alignment length (bp)</b> |
|------------------------------|-----------------------------------|-----------------------------|-------------------------|--------------------------------------|-------------------------------------|----------------------------------|----------------------------------|
| <i>Lcr</i><br>(length:658 M) | ≥ 1kb                             | 41.13%                      | 105,447                 | 2,321                                | 1,717                               | 1,000                            | 56,540                           |
|                              | ≥ 2kb                             | 26.02%                      | 41,422                  | 3,738                                | 2,967                               | 2,000                            | 56,540                           |
|                              | ≥ 5kb                             | 8.89%                       | 6,811                   | 7,769                                | 6,571                               | 5,000                            | 56,540                           |
| <i>Tru</i><br>(length:391 M) | ≥ 1kb                             | 10.04%                      | 36,032                  | 1,657                                | 1,388                               | 1,000                            | 24,987                           |
|                              | ≥ 2kb                             | 3.58%                       | 7,312                   | 2,552                                | 2,954                               | 2,000                            | 24,987                           |
|                              | ≥ 5kb                             | 0.39%                       | 352                     | 6,621                                | 5,952                               | 5,000                            | 24,987                           |

619  
 620 **Supplementary table 10.** Distribution of synteny of alignment statistics at whole  
 621 genes level at different cutoff.

| <b>Species aligned to</b>          | <b>Cutoff of block length*</b> | <b>Synteny coverage (%)</b> | <b>Block number</b> | <b>Average block length</b> | <b>Median block length</b> | <b>Min block length</b> | <b>Max block length</b> |
|------------------------------------|--------------------------------|-----------------------------|---------------------|-----------------------------|----------------------------|-------------------------|-------------------------|
| <i>Lcr</i><br>(gene number: 23423) | ≥ 4                            | 91.24                       | 529                 | 50.28                       | 28                         | 4                       | 679                     |
|                                    | ≥ 10                           | 89.19                       | 433                 | 60.05                       | 34                         | 10                      | 679                     |
|                                    | ≥ 30                           | 77.92                       | 255                 | 89.07                       | 58                         | 30                      | 679                     |
| <i>Tru</i><br>(gene number: 28679) | ≥ 4                            | 83.97                       | 593                 | 41.28                       | 20                         | 4                       | 542                     |
|                                    | ≥ 10                           | 80.93                       | 452                 | 52.19                       | 29                         | 10                      | 542                     |
|                                    | ≥ 30                           | 66.95                       | 222                 | 87.91                       | 54                         | 30                      | 542                     |

622 \* block length was defined as the spanning genes number on *Dun*.

623

624 **Supplementary table 11.** Genome assembly and gene set quality by BUSCO.

|                        |                                     | Genome level               |                          | Gene level                 |                          |
|------------------------|-------------------------------------|----------------------------|--------------------------|----------------------------|--------------------------|
|                        |                                     | <i>Larimichthys crocea</i> | <i>Takifugu rubripes</i> | <i>Larimichthys crocea</i> | <i>Takifugu rubripes</i> |
| actinopterygii (db_v9) | Complete BUSCOs (C)                 | 4362 (95.2%)               | 4263 (93.0%)             | 4554 (99.3%)               | 4345 (94.7%)             |
|                        | Complete and single-copy BUSCOs (S) | 4275 (93.3%)               | 4168 (90.9%)             | 2615 (57.0%)               | 3000 (65.4%)             |
|                        | Complete and duplicated BUSCOs (D)  | 87 (1.9%)                  | 95 (2.1%)                | 1939 (42.3%)               | 1345 (29.3%)             |
|                        | Fragmented BUSCOs (F)               | 119 (2.6%)                 | 202 (4.4%)               | 23 (0.5%)                  | 134 (2.9%)               |
|                        | Missing BUSCOs (M)                  | 103 (2.2%)                 | 119 (2.6%)               | 7 (0.2%)                   | 105 (2.4%)               |
|                        | Total BUSCO groups searched         | 4584                       | 4584                     | 4584                       | 4584                     |
| metazoa (db_v9)        | Complete BUSCOs (C)                 | 918 (93.9%)                | 915 (93.6%)              | 973 (99.5%)                | 950 (97.1%)              |
|                        | Complete and single-copy BUSCOs (S) | 882 (90.2%)                | 880 (90.0%)              | 656 (67.1%)                | 670 (68.5%)              |
|                        | Complete and duplicated BUSCOs (D)  | 36 (3.7%)                  | 35 (3.6%)                | 317 (32.4%)                | 280 (28.6%)              |
|                        | Fragmented BUSCOs (F)               | 7 (0.7%)                   | 12 (1.2%)                | 4 (0.4%)                   | 15 (1.5%)                |
|                        | Missing BUSCOs (M)                  | 53 (5.4%)                  | 51 (5.2%)                | 1 (0.1%)                   | 13 (1.4%)                |
|                        | Total BUSCO groups searched         | 978                        | 978                      | 978                        | 978                      |



626

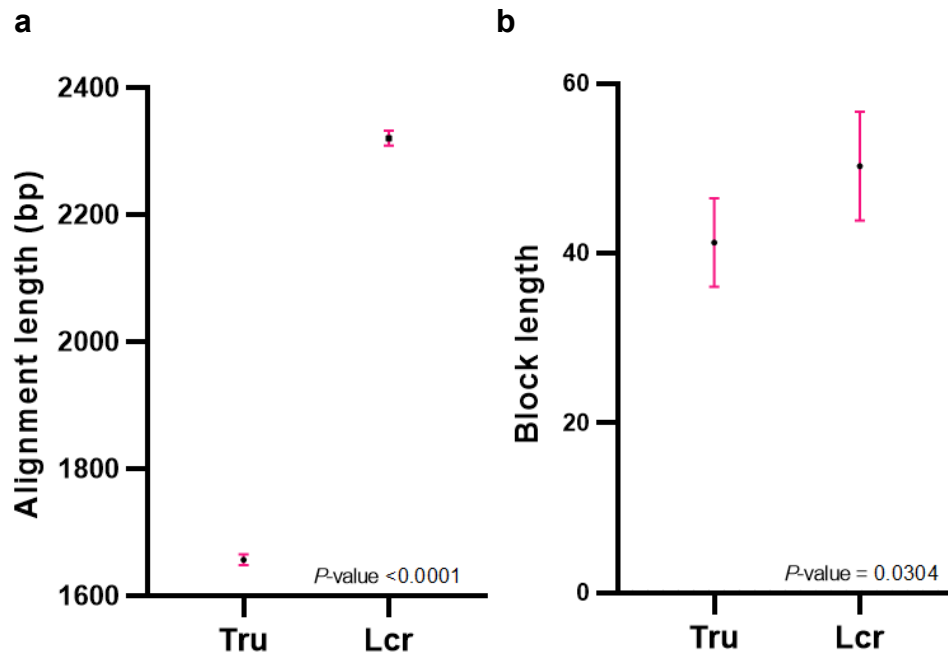

627

628 **Supplementary figure 6.** The t-test statistics of alignment length and block length. **(a)**

629 The distribution of the length of synteny blocks at nucleotide-level. *P*-value was

630 calculated using t-statistic. **(b)** The distribution of the length of synteny blocks at

631 gene-level. *P*-value was using t-statistic.

632

633 **Supplementary table 12.** Genes involved in the pigment synthesis.

| Pigmentary_function       | Gene    | Gene ID                                                                        |
|---------------------------|---------|--------------------------------------------------------------------------------|
| Components of melanosomes | gpnmb   | evm.model.scaffold89.24                                                        |
| Components of melanosomes | slc24a4 | evm.model.scaffold22.131;                                                      |
| Components of melanosomes | trpm1   | evm.model.scaffold27.487;                                                      |
| Components of melanosomes | tspan10 | evm.model.scaffold80.229;                                                      |
| Components of melanosomes | vat1    | evm.model.scaffold18344.71;evm.model.scaffold18367.69;evm.model.scaffold60.236 |
| Iridophores               | chm     | evm.model.scaffold200.145                                                      |
| Iridophores               | csf1    | evm.model.scaffold64.448                                                       |
| Iridophores               | ece2    | evm.model.scaffold75.239                                                       |
| Iridophores               | fbxw4   | evm.model.scaffold111.35;                                                      |
| Iridophores               | fh12    | evm.model.scaffold61.509;evm.model.scaffold63.296;evm.model.scaffold82.226     |
| Iridophores               | foxd3   | evm.model.scaffold23.901;                                                      |
| Iridophores               | gart    | evm.model.scaffold82.268;                                                      |

|                                                                  |          |                                                                                                     |
|------------------------------------------------------------------|----------|-----------------------------------------------------------------------------------------------------|
| Iridophores                                                      | ltk      | evm.model.scaffold61.336;                                                                           |
| Iridophores                                                      | med12    | evm.model.scaffold81.240;                                                                           |
| Iridophores                                                      | mpv17    | evm.model.scaffold18251.25;evm.model.scaffold18349.23;                                              |
| Iridophores                                                      | trim33   | evm.model.scaffold158.1;                                                                            |
| Iridophores, Melanocyte development                              | ednrb    | evm.model.scaffold76.195;evm.model.scaffold62.302;evm.model.scaffold63.409;                         |
| Iridophores, Melanocyte development                              | impdh1   | evm.model.scaffold27.353;evm.model.scaffold66.197;evm.model.scaffold67.196;                         |
| Iridophores, Melanocyte development                              | oca2     | evm.model.scaffold23.184                                                                            |
| Iridophores, Melanocyte development                              | sox9     | evm.model.scaffold80.182;                                                                           |
| Iridophores, Melanocyte development, Xanthophore differentiation | sox10    | evm.model.scaffold85.272;                                                                           |
| Leucophores, Pteridine synthesis                                 | xdh      | evm.model.scaffold82.33;                                                                            |
| Leucophores, Xanthophore differentiation                         | gch1     | evm.model.scaffold110.30;                                                                           |
| Leucophores, Xanthophore differentiation                         | pax7     | evm.model.scaffold24.275;                                                                           |
| Leucophores, Xanthophore differentiation                         | slc2a11  | evm.model.scaffold60.596;evm.model.scaffold24.381;evm.model.scaffold24.795;evm.model.scaffold26.142 |
| Melanocyte development                                           | adam17   | evm.model.scaffold61.347;                                                                           |
| Melanocyte development                                           | adamts20 | evm.model.scaffold27.709;                                                                           |
| Melanocyte development                                           | adrb2    | evm.model.scaffold62.231;                                                                           |
| Melanocyte development                                           | apc      | evm.model.scaffold155.410;                                                                          |
| Melanocyte development                                           | atp6v0b  | evm.model.scaffold75.6;                                                                             |
| Melanocyte development                                           | bcl2     | evm.model.scaffold75.147;                                                                           |
| Melanocyte development                                           | brsk2    | evm.model.scaffold27.208;evm.model.scaffold89.353                                                   |
| Melanocyte development                                           | c10orf11 | evm.model.scaffold28.337;evm.model.scaffold28.342                                                   |
| Melanocyte development                                           | cited1   | evm.model.scaffold157.20                                                                            |
| Melanocyte development                                           | creb1    | evm.model.scaffold63.159;                                                                           |
| Melanocyte development                                           | dct      | evm.model.scaffold63.418;                                                                           |
| Melanocyte development                                           | dock7    | evm.model.scaffold23.909;evm.model.scaffold80.316                                                   |
| Melanocyte development                                           | eda      | evm.model.scaffold62.157                                                                            |
| Melanocyte development                                           | edar     | evm.model.scaffold63.630;                                                                           |
| Melanocyte development                                           | edn3     | evm.model.scaffold24.1046;evm.model.scaffold64.123;                                                 |

|                        |        |                                                                            |
|------------------------|--------|----------------------------------------------------------------------------|
| Melanocyte development | ednrb2 | evm.model.scaffold173.15;evm.model.scaffold90.41                           |
| Melanocyte development | egfr   | evm.model.scaffold75.24;                                                   |
| Melanocyte development | en1    | evm.model.scaffold83.123                                                   |
| Melanocyte development | erbb3  | evm.model.scaffold24.541;                                                  |
| Melanocyte development | fgfr2  | evm.model.scaffold28.677;                                                  |
| Melanocyte development | frem2  | evm.model.scaffold25.244;evm.model.scaffold58.224;evm.model.scaffold88.161 |
| Melanocyte development | fzd4   | evm.model.scaffold58.625;                                                  |
| Melanocyte development | gata3  | evm.model.scaffold17418.1;                                                 |
| Melanocyte development | gfpt1  | evm.model.scaffold176.182;                                                 |
| Melanocyte development | gja5   | evm.model.scaffold63.370;                                                  |
| Melanocyte development | gli3   | evm.model.scaffold45.346;                                                  |
| Melanocyte development | gnaq   | evm.model.scaffold26.243;                                                  |
| Melanocyte development | gpc3   | evm.model.scaffold62.322;evm.model.scaffold62.324;                         |
| Melanocyte development | gpr161 | evm.model.scaffold63.326;                                                  |
| Melanocyte development | hdac1  | evm.model.scaffold87.53;                                                   |
| Melanocyte development | hps1   | evm.model.scaffold28.431;                                                  |
| Melanocyte development | hps4   | evm.model.scaffold176.213;                                                 |
| Melanocyte development | hps6   | evm.model.scaffold28.443;                                                  |
| Melanocyte development | hsd3b1 | evm.model.scaffold121.40                                                   |
| Melanocyte development | igsf11 | evm.model.scaffold88.256                                                   |
| Melanocyte development | ikbkg  | evm.model.scaffold153.7;                                                   |
| Melanocyte development | irf4   | evm.model.scaffold23.1068;                                                 |
| Melanocyte development | itgb1  | evm.model.scaffold107.36;evm.model.scaffold45.427                          |
| Melanocyte development | kcnj13 | evm.model.scaffold148.100                                                  |
| Melanocyte development | kit    | evm.model.scaffold23.254;                                                  |
| Melanocyte development | kitlg  | evm.model.scaffold27.925                                                   |
| Melanocyte development | lmx1a  | evm.model.scaffold23.711;evm.model.scaffold80.296                          |
| Melanocyte development | mbtps1 | evm.model.scaffold105.8;                                                   |
| Melanocyte development | mcoln3 | evm.model.scaffold107.276;evm.model.scaffold23.933                         |
| Melanocyte development | mef2c  | evm.model.scaffold26.63;                                                   |
| Melanocyte development | mib1   | evm.model.scaffold75.31;                                                   |
| Melanocyte development | mib2   | evm.model.scaffold130.11;                                                  |
| Melanocyte development | mitf   | evm.model.scaffold24.917;evm.model.scaffold90.355                          |
| Melanocyte development | mreg   | evm.model.scaffold63.744                                                   |
| Melanocyte development | myc    | evm.model.scaffold45.322;                                                  |
| Melanocyte development | myo5a  | evm.model.scaffold89.43;                                                   |
| Melanocyte development | oprm1  | evm.model.scaffold28.210;                                                  |

|                                                 |         |                                                    |
|-------------------------------------------------|---------|----------------------------------------------------|
| Melanocyte development                          | rab27a  | evm.model.scaffold78.237;                          |
| Melanocyte development                          | recql4  | evm.model.scaffold79.292                           |
| Melanocyte development                          | rnf41   | evm.model.scaffold90.252;                          |
| Melanocyte development                          | scarb2  | evm.model.scaffold155.132;                         |
| Melanocyte development                          | scg2    | evm.model.scaffold147.42;evm.model.scaffold75.225  |
| Melanocyte development                          | sf3b1   | evm.model.scaffold63.23;                           |
| Melanocyte development                          | sfxn1   | evm.model.scaffold28.394;evm.model.scaffold62.97   |
| Melanocyte development                          | skiv2l2 | evm.model.scaffold155.121;                         |
| Melanocyte development                          | slc24a5 | evm.model.scaffold104.16;                          |
| Melanocyte development                          | slc45a2 | evm.model.scaffold155.130;                         |
| Melanocyte development                          | snai2   | evm.model.scaffold75.68;                           |
| Melanocyte development                          | sox18   | evm.model.scaffold90.125                           |
| Melanocyte development                          | sox2    | evm.model.scaffold23.977;                          |
| Melanocyte development                          | tfap2e  | evm.model.scaffold79.450;                          |
| Melanocyte development                          | trpm7   | evm.model.scaffold89.41;                           |
| Melanocyte development                          | tyr     | evm.model.scaffold58.630;                          |
| Melanocyte development                          | tyrp1   | evm.model.scaffold108.177;                         |
| Melanocyte development                          | usp13   | evm.model.scaffold23.587;                          |
| Melanocyte development                          | vps11   | evm.model.scaffold201.85;                          |
| Melanocyte development                          | vps18   | evm.model.scaffold22.483                           |
| Melanocyte development                          | zic2    | evm.model.scaffold63.207;                          |
| Melanocyte development,<br>Melanosome transport | tpcn2   | evm.model.scaffold110.180;                         |
| Melanogenesis regulation                        | asip1   | evm.model.scaffold24.1152;                         |
| Melanogenesis regulation                        | atn     | evm.model.scaffold61.91;evm.model.scaffold61.93    |
| Melanogenesis regulation                        | clcn7   | evm.model.scaffold85.359;                          |
| Melanogenesis regulation                        | corin   | evm.model.scaffold103.174;                         |
| Melanogenesis regulation                        | ctns    | evm.model.scaffold23.51;                           |
| Melanogenesis regulation                        | drd2    | evm.model.scaffold58.505;                          |
| Melanogenesis regulation                        | mc1r    | evm.model.scaffold84.143;                          |
| Melanogenesis regulation                        | mgn1    | evm.model.scaffold80.306;                          |
| Melanogenesis regulation                        | mygl    | evm.model.scaffold24.229                           |
| Melanogenesis regulation                        | nf1     | evm.model.scaffold148.96;                          |
| Melanogenesis regulation                        | ostm1   | evm.model.scaffold22.252                           |
| Melanogenesis regulation                        | pah     | evm.model.scaffold66.283;evm.model.scaffold67.285; |
| Melanogenesis regulation                        | pomc    | evm.model.scaffold18287.1;evm.model.scaffold82.36; |
| Melanogenesis regulation                        | shroom2 | evm.model.scaffold23.206;evm.model.scaffold28.153; |
| Melanogenesis regulation                        | slc7a11 | evm.model.scaffold109.18;                          |

|                                                           |         |                                                     |
|-----------------------------------------------------------|---------|-----------------------------------------------------|
| Melanogenesis regulation                                  | zeb2    | evm.model.scaffold63.1009;evm.model.scaffold82.245; |
| Melanogenesis regulation,<br>Components of<br>melanosomes | rab32   | evm.model.scaffold22.284;                           |
| Melanogenesis regulation,<br>Components of<br>melanosomes | rab38   | evm.model.scaffold58.626;                           |
| Melanosome biogenesis                                     | ankrd27 | evm.model.scaffold123.74;evm.model.scaffold17829.1; |
| Melanosome biogenesis                                     | ap1g1   | evm.model.scaffold78.212;                           |
| Melanosome biogenesis                                     | ap1m1   | evm.model.scaffold107.226;                          |
| Melanosome biogenesis                                     | ap3b1   | evm.model.scaffold186.47;                           |
| Melanosome biogenesis                                     | ap3d1   | evm.model.scaffold23.686;                           |
| Melanosome biogenesis                                     | bloc1s2 | evm.model.scaffold23.292;                           |
| Melanosome biogenesis                                     | bloc1s3 | evm.model.scaffold58.568;                           |
| Melanosome biogenesis                                     | bloc1s4 | evm.model.scaffold79.226                            |
| Melanosome biogenesis                                     | bloc1s6 | evm.model.scaffold104.27;                           |
| Melanosome biogenesis                                     | cd63    | evm.model.scaffold90.258;                           |
| Melanosome biogenesis                                     | dtnbp1  | evm.model.scaffold79.219;                           |
| Melanosome biogenesis                                     | fig4    | evm.model.scaffold22.305                            |
| Melanosome biogenesis                                     | gpr143  | evm.model.scaffold63.395;                           |
| Melanosome biogenesis                                     | hps3    | evm.model.scaffold23.989;                           |
| Melanosome biogenesis                                     | hps5    | evm.model.scaffold27.568;                           |
| Melanosome biogenesis                                     | kif13a  | evm.model.scaffold22.1353;                          |
| Melanosome biogenesis                                     | lyst    | evm.model.scaffold28.639                            |
| Melanosome biogenesis                                     | mlana   | evm.model.scaffold155.272;                          |
| Melanosome biogenesis                                     | nsf     | evm.model.scaffold125.81;evm.model.scaffold85.138   |
| Melanosome biogenesis                                     | rabggta | evm.model.scaffold23.271;                           |
| Melanosome biogenesis                                     | th      | evm.model.scaffold27.193;                           |
| Melanosome biogenesis                                     | txndc5  | evm.model.scaffold45.10;                            |
| Melanosome biogenesis                                     | vps33a  | evm.model.scaffold176.125;                          |
| Melanosome biogenesis,<br>Melanocyte development          | bloc1s5 | evm.model.scaffold45.11;                            |
| Melanosome transport                                      | crh     | evm.model.scaffold45.154;                           |
| Melanosome transport                                      | dctn1   | evm.model.scaffold108.42;evm.model.scaffold61.121   |
| Melanosome transport                                      | dctn2   | evm.model.scaffold24.217;                           |
| Melanosome transport                                      | ippk    | evm.model.scaffold173.23;                           |
| Melanosome transport                                      | map2k1  | evm.model.scaffold27.524;                           |
| Melanosome transport                                      | mlph    | evm.model.scaffold63.882                            |
| Melanosome transport                                      | myo7a   | evm.model.scaffold122.10;                           |
| Melanosome transport                                      | rab11a  | evm.model.scaffold89.340;                           |

|                                                         |          |                                                                                                      |
|---------------------------------------------------------|----------|------------------------------------------------------------------------------------------------------|
| Melanosome transport                                    | rab17    | evm.model.scaffold63.881;                                                                            |
| Melanosome transport                                    | rab1a    | evm.model.scaffold106.125;evm.model.scaffold111.24;evm.model.scaffold122.11;evm.model.scaffold135.99 |
| Melanosome transport                                    | rab3ip   | evm.model.scaffold68.83;evm.model.scaffold69.84;                                                     |
| Melanosome transport                                    | rab8a    | evm.model.scaffold23.677;                                                                            |
| Melanosome transport                                    | ric8b    | evm.model.scaffold27.301                                                                             |
| Melanosome transport                                    | tmem33   | evm.model.scaffold86.109                                                                             |
| Melanosome transport,<br>Melanosome biogenesis          | pmel     | evm.model.scaffold24.612;evm.model.scaffold79.47;                                                    |
| Melanosome transport,<br>Melanosome biogenesis          | trappc6a | evm.model.scaffold58.569;                                                                            |
| Pigment cell differentiation                            | cdh2     | evm.model.scaffold75.131;                                                                            |
| Pigment cell differentiation                            | lef1     | evm.model.scaffold25.192;                                                                            |
| Pigment cell differentiation                            | ovol1    | evm.model.scaffold131.150;                                                                           |
| Pigment cell differentiation,<br>Melanocyte development | wnt3a    | evm.model.scaffold75.50;                                                                             |
| Pteridine synthesis                                     | gchfr    | evm.model.scaffold61.168                                                                             |
| Pteridine synthesis                                     | mycbp2   | evm.model.scaffold63.234;                                                                            |
| Pteridine synthesis                                     | pcbd1    | evm.model.scaffold165.14;                                                                            |
| Pteridine synthesis                                     | pcbd2    | evm.model.scaffold77.416;                                                                            |
| Pteridine synthesis                                     | qdpr     | evm.model.scaffold86.97;                                                                             |
| Pteridine synthesis                                     | spr      | evm.model.scaffold26.365;evm.model.scaffold59.406                                                    |
| Pteridine synthesis,<br>Melanogenesis regulation        | gart     | evm.model.scaffold82.268;                                                                            |
| Xanthophore differentiation                             | ghr      | evm.model.scaffold26.345;evm.model.scaffold59.333;                                                   |
| Xanthophore differentiation                             | leo1     | evm.model.scaffold159.5;                                                                             |
| Xanthophore differentiation                             | pax3     | evm.model.scaffold147.48;evm.model.scaffold147.49;evm.model.scaffold15214.1;                         |
| Xanthophore differentiation                             | sox5     | evm.model.scaffold65.166;                                                                            |

635 **Supplementary table 13.** KEGG pathway involved by contracted gene families

| <b>Level 1 KEGG pathway</b>          | <b>Level 2 KEGG pathway</b>          | <b>Number of gene family</b> | <b>Detail of gene family (ID)</b>                          |
|--------------------------------------|--------------------------------------|------------------------------|------------------------------------------------------------|
| Cellular Processes                   | Cell growth and death                | 10                           | 2348;23;26;18;2368;1576;415;774;2156;493                   |
| Cellular Processes                   | Cell motility                        | 1                            | 5098                                                       |
| Cellular Processes                   | Cellular community-eukaryotes        | 4                            | 4060;894;680;2920                                          |
| Cellular Processes                   | Transport and catabolism             | 11                           | 528;958;2678;1949;960;2065;2061;2348;2920;950;529          |
| Environmental Information Processing | Membrane transport                   | 2                            | 3614;2065                                                  |
| Environmental Information Processing | Signal transduction                  | 13                           | 4381;525;894;2065;528;542;680;2156;529;5098;4490;2061;4507 |
| Environmental Information Processing | Signaling molecules and interaction  | 13                           | 4060;2061;1967;2348;611;521;525;631;616;894;1965;542;680   |
| Genetic Information Processing       | Folding, sorting and degradation     | 1                            | 561                                                        |
| Genetic Information Processing       | Replication and repair               | 3                            | 2065;493;562                                               |
| Genetic Information Processing       | Transcription                        | 1                            | 493                                                        |
| Genetic Information Processing       | Translation                          | 4                            | 482;497;2020;4918                                          |
| Metabolism                           | Carbohydrate metabolism              | 2                            | 2065;2061                                                  |
| Metabolism                           | Global and overview maps             | 9                            | 2499;2514;2061;2065;6338;2047;2020;3783;3762               |
| Metabolism                           | Glycan biosynthesis and metabolism   | 4                            | 497;6338;955;3762                                          |
| Metabolism                           | Lipid metabolism                     | 3                            | 3783;2514;2047                                             |
| Metabolism                           | Metabolism of cofactors and vitamins | 1                            | 2499                                                       |
| Organismal Systems                   | Aging                                | 1                            | 2514                                                       |
| Organismal Systems                   | Circulatory system                   | 2                            | 5098;2156                                                  |
| Organismal Systems                   | Development                          | 2                            | 482;1949                                                   |

|                    |                          |    |                                                                |
|--------------------|--------------------------|----|----------------------------------------------------------------|
| Organismal Systems | Digestive system         | 7  | 1021;5098;2156;680;955;894;2065                                |
| Organismal Systems | Endocrine system         | 8  | 3614;4381;2156;680;2514;4490;5098;2061                         |
| Organismal Systems | Environmental adaptation | 3  | 4490;2156;680                                                  |
| Organismal Systems | Immune system            | 23 | 493;1965;542;23;26;18;2301;1967;2348;4490;525;1949;4857;528;77 |
| Organismal Systems | Nervous system           | 6  | 4;680;4060;529;4855;2368;12264;2565;482                        |
| Organismal Systems | Sensory system           | 7  | 2514;2061;4490;680;3783;2156                                   |
| Organismal Systems | Sensory system           | 7  | 2621;2514;2617;2061;2619;680;2156                              |

---

636

637

638

639

640

641

642

643

644

645

646

647

648



649 **Supplementary table 14.** KEGG pathway involved by size expanded gene families

| <b>Level 1 KEGG pathway</b>          | <b>Level 2 KEGG pathway</b>         | <b>Number of gene family</b> | <b>Detail of gene family (ID)</b> |
|--------------------------------------|-------------------------------------|------------------------------|-----------------------------------|
| Cellular Processes                   | Cell growth and death               | 2                            | 6680;2948                         |
| Cellular Processes                   | Transport and catabolism            | 1                            | 2967                              |
| Environmental Information Processing | Signal transduction                 | 3                            | 3683;2654;6680                    |
| Environmental Information Processing | Signaling molecules and interaction | 2                            | 2654;6680                         |
| Genetic Information Processing       | Folding, sorting and degradation    | 1                            | 794                               |
| Metabolism                           | Global and overview maps            | 2                            | 9457;3404                         |
| Metabolism                           | Glycan biosynthesis and metabolism  | 2                            | 9457;3404                         |
| Organismal Systems                   | Development                         | 2                            | 1171;6680                         |
| Organismal Systems                   | Digestive system                    | 1                            | 3933                              |
| Organismal Systems                   | Endocrine system                    | 1                            | 3683                              |
| Organismal Systems                   | Environmental adaptation            | 1                            | 2654                              |
| Organismal Systems                   | Immune system                       | 1                            | 6680                              |
| Organismal Systems                   | Nervous system                      | 1                            | 2654                              |
| Organismal Systems                   | Sensory system                      | 1                            | 546                               |

650 **Supplementary table 15.** The detail for contracted gene families.

| <b>family ID</b> | <b>accents KO to gene family*</b> | <b>function of gene family</b>                                                                                           |
|------------------|-----------------------------------|--------------------------------------------------------------------------------------------------------------------------|
| 4                | -                                 | -                                                                                                                        |
| 112              | -                                 | -                                                                                                                        |
| 121              | -                                 | -                                                                                                                        |
| 127              | K09228                            | KRAB, KRAB domain-containing zinc finger protein                                                                         |
| 139              | K09228                            | KRAB, KRAB domain-containing zinc finger protein                                                                         |
| 148              | K09228                            | KRAB, KRAB domain-containing zinc finger protein                                                                         |
| 149              | K09228                            | KRAB, KRAB domain-containing zinc finger protein                                                                         |
| 276              | -                                 | -                                                                                                                        |
| 400              | K04299                            | P2RY14, purinergic receptor P2Y, G protein-coupled, 14                                                                   |
| 414              | K05051                            | TAAR, trace amine associated receptor                                                                                    |
| 439              | K05051                            | TAAR, trace amine associated receptor                                                                                    |
| 506              | K20865                            | NLRP12, NACHT, LRR and PYD domains-containing protein 12                                                                 |
| 508              | K22614                            | NLRC3, NOD3, NLR family CARD domain-containing protein 3                                                                 |
| 511              | K22614                            | NLRC3, NOD3, NLR family CARD domain-containing protein 3                                                                 |
| 512              | K22614                            | NLRC3, NOD3, NLR family CARD domain-containing protein 3                                                                 |
| 537              | K01446                            | PGRP, peptidoglycan recognition protein                                                                                  |
| 539              | K06712                            | BTN, CD277, butyrophilin                                                                                                 |
| 556              | K06751                            | MHC1, major histocompatibility complex, class I                                                                          |
| 557              | K06751                            | MHC1, major histocompatibility complex, class I<br>CEACAM, CD66, carcinoembryonic antigen-related cell adhesion molecule |
| 603              | K06499                            | molecule                                                                                                                 |
| 608              | K06467                            | CD22, SIGLEC2, CD22 antigen                                                                                              |
| 610              | K06467                            | CD22, SIGLEC2, CD22 antigen                                                                                              |
| 647              | -                                 | -                                                                                                                        |
| 654              | K12012                            | TRIM35, tripartite motif-containing protein 35                                                                           |
| 663              | K12006                            | TRIM16, tripartite motif-containing protein 16                                                                           |
| 669              | K12006                            | TRIM16, tripartite motif-containing protein 16                                                                           |
| 675              | K12015                            | TRIM39, tripartite motif-containing protein 39 [EC:2.3.2.27]                                                             |
| 813              | K17388                            | ROCK2, Rho-associated protein kinase 2 [EC:2.7.11.1]                                                                     |
| 814              | -                                 | -                                                                                                                        |
| 826              | -                                 | -                                                                                                                        |
| 827              | K17854                            | CYP2K, cytochrome P450 family 2 subfamily K                                                                              |
| 939              | -                                 | -                                                                                                                        |
| 951              | K08826                            | HIPK, homeodomain interacting protein kinase [EC:2.7.11.1]                                                               |
| 991              | K10380                            | ANK, ankyrin                                                                                                             |

|      |        |                                                               |
|------|--------|---------------------------------------------------------------|
| 1057 | K07375 | TUBB, tubulin beta                                            |
| 1059 | -      | -                                                             |
| 1100 | K07377 | NRXN, neurexin                                                |
| 1392 | -      | -                                                             |
| 1492 | K03654 | recQ, ATP-dependent DNA helicase RecQ [EC:3.6.4.12]           |
| 1498 | K06560 | MRC, CD206, CD280, mannose receptor, C type                   |
| 1502 | -      | -                                                             |
| 1505 | K06560 | MRC, CD206, CD280, mannose receptor, C type                   |
| 1518 | K11275 | H1_5, histone H1/5                                            |
| 1519 | K11252 | H2B, histone H2B                                              |
| 1521 | K11253 | H3, histone H3                                                |
| 1522 | K11251 | H2A, histone H2A                                              |
| 1533 | K18626 | TCHH, trichohyalin                                            |
| 1554 | K05096 | FLT1, VEGFR1, FMS-like tyrosine kinase 1 [EC:2.7.10.1]        |
| 1567 | K06634 | CCNH, cyclin H                                                |
| 1592 | K16826 | SIRPB2, signal-regulatory protein beta 2                      |
| 1593 | K16826 | SIRPB2, signal-regulatory protein beta 2                      |
| 1597 | K10784 | TRAV, T cell receptor alpha chain V region                    |
| 1599 | K06553 | VPREB, CD179a, pre-B lymphocyte gene                          |
| 1600 | K06856 | IGH, immunoglobulin heavy chain                               |
| 1601 | K06856 | IGH, immunoglobulin heavy chain                               |
|      |        | IGLL1, IGLL, CD179b, immunoglobulin lambda-like polypeptide   |
| 1611 | K06554 | 1                                                             |
| 1613 | K06553 | VPREB, CD179a, pre-B lymphocyte gene                          |
| 1614 | K10785 | TRBV, T-cell receptor beta chain V region                     |
| 1634 | K09228 | KRAB, KRAB domain-containing zinc finger protein              |
| 1659 | K04257 | OLFR, olfactory receptor                                      |
| 1664 | K04257 | OLFR, olfactory receptor                                      |
| 1666 | K04257 | OLFR, olfactory receptor                                      |
|      |        | C1QTNF6, complement C1q tumor necrosis factor-related protein |
| 1769 | K19470 | 6                                                             |
| 1807 | K06238 | COL6A, collagen, type VI, alpha                               |
| 2057 | -      | -                                                             |
| 2080 | -      | -                                                             |
| 2117 | K01068 | ACOT1_2_4, acyl-coenzyme A thioesterase 1/2/4 [EC:3.1.2.2]    |
| 2142 | K04615 | GABBR, gamma-aminobutyric acid type B receptor                |
|      |        | SART3, TIP110, squamous cell carcinoma antigen recognized by  |
| 2146 | K22611 | T-cells 3                                                     |

|       |        |                                                                    |
|-------|--------|--------------------------------------------------------------------|
| 2159  | K16810 | TBCCD1, TBCC domain-containing protein 1                           |
| 2200  | K18543 | HCE, choriolysin H [EC:3.4.24.67]                                  |
| 2614  | K14480 | APOL, apolipoprotein L                                             |
| 2787  | K06719 | CD300, CD300 antigen                                               |
| 3054  | K06556 | CD200, CD200 antigen                                               |
| 3071  | K06733 | SLAMF7, CD319, SLAM family member 7                                |
| 3082  | -      | -                                                                  |
| 3084  | -      | -                                                                  |
|       |        | SLC6A6S, solute carrier family 6 (neurotransmitter transporter,    |
| 3480  | K05039 | GABA) member 6/8/11/12/13                                          |
| 3550  | -      | -                                                                  |
| 3561  | -      | -                                                                  |
| 3620  | -      | -                                                                  |
|       |        | ALOXE3, hydroperoxy icosatetraenoate dehydratase/isomerase         |
| 3651  | K18684 | [EC:4.2.1.152 5.4.4.7]                                             |
|       |        | TNFRSF14, HVEM, CD270, tumor necrosis factor receptor              |
| 3796  | K05152 | superfamily member 14                                              |
| 3883  | -      | -                                                                  |
| 3919  | K06087 | CLDN, claudin                                                      |
| 4277  | -      | -                                                                  |
| 4321  | K13826 | HBZ, hemoglobin subunit zeta                                       |
| 4384  | -      | -                                                                  |
| 4401  | K17072 | IFI47, interferon gamma inducible protein 47                       |
| 4503  | K21922 | KCTD21, BTB/POZ domain-containing protein KCTD21                   |
| 4741  | K04612 | CASR, calcium-sensing receptor                                     |
| 4743  | K04612 | CASR, calcium-sensing receptor                                     |
|       |        | DHRSX, dehydrogenase/reductase SDR family member X                 |
| 4827  | K11170 | [EC:1.1.-.-]                                                       |
|       |        | IgLL1, IGLL, CD179b, immunoglobulin lambda-like polypeptide        |
| 4846  | K06554 | 1                                                                  |
|       |        | FUT9, 4-galactosyl-N-acetylglucosaminide                           |
| 6363  | K03663 | 3-alpha-L-fucosyltransferase [EC:2.4.1.152]                        |
| 7663  | K14217 | IFIT1, interferon-induced protein with tetratricopeptide repeats 1 |
| 11586 | -      | -                                                                  |
| 11850 | -      | -                                                                  |
| 11970 | K14639 | SLC15A5, solute carrier family 15, member 5                        |
| 12008 | K09228 | KRAB, KRAB domain-containing zinc finger protein                   |
| 12055 | K03985 | PLAUR, CD87, plasminogen activator, urokinase receptor             |

---
